# Supplementary material for: Isolation of new compounds related to xyloketals biosynthesis implies an alternative pathway for furan-fused-chromene formation
Source: Royal Society of Chemistry journal article supplement (doi:10.1039/d3ob00426k), 2023-01-01
Supplement: d3ob00426k1.pdf [file d3ob00426k1.pdf]

## Electronic Supporting Information

### Isolation of new compounds related to xyloketal biosynthesis implies an alternative pathway for furan-fused-chromene formation

Jia-Hua Huang, ‡<sup>a</sup> Jian-Ming Lv, ‡<sup>b</sup> Yan-Feng Xie, <sup>b</sup> Huan Zhao, <sup>c</sup> Liang-Yan Xiao, <sup>b</sup> Ping Dai, <sup>b</sup> Sheng-Ying Qin, <sup>d</sup> Dan Hu, <sup>\*b,c</sup> Hao Gao <sup>\*a,b</sup> and Xin-Sheng Yao <sup>\*a,b</sup>

<sup>a</sup> School of Traditional Chinese Materia Medica, Shenyang Pharmaceutical University, Shenyang 110016, China. E-mail: tyaoxs@jnu.edu.cn

<sup>b</sup> Institute of Traditional Chinese Medicine & Natural Products, College of Pharmacy / Guangdong Province Key Laboratory of Pharmacodynamic Constituents of TCM and New Drugs Research / International Cooperative Laboratory of Traditional Chinese Medicine Modernization and Innovative Drug Development of Ministry of Education (MOE) of China, Jinan University, Guangzhou 510632, China. E-mail: thudan@jnu.edu.cn; tghao@jnu.edu.cn

<sup>c</sup> College of Traditional Chinese Medicine, Jinan University, Guangzhou 510632, China  
Clinical Experimental Center, First Affiliated Hospital of Jinan University, Guangzhou 510630, China

<sup>d</sup> Shenzhen Institute of Synthetic Biology, Shenzhen Institute of Advanced Technology, Chinese Academy of Sciences, Shenzhen 518055, China.

# Table of Contents

|                                                                                                                                                       |    |
|-------------------------------------------------------------------------------------------------------------------------------------------------------|----|
| Supplementary Tables.....                                                                                                                             | 1  |
| Table S1. NMR data for compound 1 in CDCl <sub>3</sub> .....                                                                                          | 1  |
| Table S2. NMR data for compound 2 in CDCl <sub>3</sub> .....                                                                                          | 2  |
| Table S3. NMR data for compound 3 in CDCl <sub>3</sub> .....                                                                                          | 3  |
| Table S4. NMR data for compound 4 in CDCl <sub>3</sub> .....                                                                                          | 4  |
| Table S5. NMR data for compound 5 in CDCl <sub>3</sub> .....                                                                                          | 5  |
| Table S6. Mean absolute error (MAE) values, R square (R <sup>2</sup> ) of the linear correlations,<br>and DP4+ probability analysis of 5a and 5b..... | 6  |
| Table S7. NMR data for compound 6 in CDCl <sub>3</sub> .....                                                                                          | 7  |
| Table S8. <sup>1</sup> H and <sup>13</sup> C NMR data for Ac-5 in CDCl <sub>3</sub> . ....                                                            | 8  |
| Table S9. <sup>1</sup> H and <sup>13</sup> C NMR data for 7 in CDCl <sub>3</sub> . ....                                                               | 9  |
| Table S10. <sup>1</sup> H and <sup>13</sup> C NMR data for 8 in CD <sub>3</sub> OD. ....                                                              | 10 |
| Table S11. <sup>1</sup> H and <sup>13</sup> C NMR data for 9 in CD <sub>3</sub> OD. ....                                                              | 11 |
| Table S12. <sup>1</sup> H and <sup>13</sup> C NMR data for 10 in CDCl <sub>3</sub> . ....                                                             | 12 |
| Table S13. <sup>1</sup> H and <sup>13</sup> C NMR data for 11 in CDCl <sub>3</sub> . ....                                                             | 13 |
| Table S14. <sup>1</sup> H and <sup>13</sup> C NMR data for authentic <i>O</i> -methylorcinol.....                                                     | 14 |
| Supplementary Figures .....                                                                                                                           | 15 |
| Figure S1. Representative natural products containing furan-fused chromene units. ....                                                                | 15 |
| Figure S2. Most stable conformers of (1 <i>R</i> *, 6 <i>R</i> *)-5a and (1 <i>S</i> *, 6 <i>R</i> *) -5b. ....                                       | 16 |
| Figure S3. Most stable conformers of (1 <i>R</i> , 6 <i>S</i> )-5. ....                                                                               | 17 |
| Figure S4. Cell viability of human cancer cells supplemented with the tested<br>compound. ....                                                        | 18 |
| Figure S5. <sup>1</sup> H NMR spectrum of 1 in CDCl <sub>3</sub> at 600 MHz. ....                                                                     | 19 |
| Figure S6. <sup>13</sup> C NMR spectrum of 1 in CDCl <sub>3</sub> at 150 MHz. ....                                                                    | 19 |
| Figure S7. <sup>1</sup> H- <sup>1</sup> H COSY spectrum of 1 in CDCl <sub>3</sub> at 600 MHz. ....                                                    | 20 |
| Figure S8. HSQC spectrum of 1 in CDCl <sub>3</sub> at 600 MHz.....                                                                                    | 21 |
| Figure S9. HMBC spectrum of 1 in CDCl <sub>3</sub> at 600 MHz.....                                                                                    | 21 |
| Figure S10. NOESY spectrum of 1 in CDCl <sub>3</sub> at 600 MHz. ....                                                                                 | 22 |
| Figure S11. <sup>1</sup> H NMR spectrum of 2 in CDCl <sub>3</sub> at 400 MHz. ....                                                                    | 23 |
| Figure S12. <sup>13</sup> C NMR spectrum of 2 in CDCl <sub>3</sub> at 100 MHz. ....                                                                   | 23 |

|                                                                                               |    |
|-----------------------------------------------------------------------------------------------|----|
| Figure S13. $^1\text{H}$ - $^1\text{H}$ COSY spectrum of 2 in $\text{CDCl}_3$ at 400 MHz..... | 24 |
| Figure S14. HSQC spectrum of 2 in $\text{CDCl}_3$ at 400 MHz.....                             | 25 |
| Figure S15. HMBC spectrum of 2 in $\text{CDCl}_3$ at 400 MHz.....                             | 25 |
| Figure S16. NOESY spectrum of 2 in $\text{CDCl}_3$ at 400 MHz. ....                           | 26 |
| Figure S17. $^1\text{H}$ NMR spectrum of 3 in $\text{CDCl}_3$ at 400 MHz. ....                | 27 |
| Figure S18. $^{13}\text{C}$ NMR spectrum of 3 in $\text{CDCl}_3$ at 100 MHz. ....             | 27 |
| Figure S19. $^1\text{H}$ - $^1\text{H}$ COSY spectrum of 3 in $\text{CDCl}_3$ at 400 MHz..... | 28 |
| Figure S20. HSQC spectrum of 3 in $\text{CDCl}_3$ at 600 MHz.....                             | 29 |
| Figure S21. HMBC spectrum of 3 in $\text{CDCl}_3$ at 600 MHz.....                             | 29 |
| Figure S22. NOESY spectrum of 3 in $\text{CDCl}_3$ at 600 MHz. ....                           | 30 |
| Figure S23. $^1\text{H}$ NMR spectrum of 4 in $\text{CDCl}_3$ at 400 MHz. ....                | 31 |
| Figure S24. $^{13}\text{C}$ NMR spectrum of 4 in $\text{CDCl}_3$ at 100 MHz. ....             | 31 |
| Figure S25. $^1\text{H}$ - $^1\text{H}$ COSY spectrum of 4 in $\text{CDCl}_3$ at 400 MHz..... | 32 |
| Figure S26. HSQC NMR spectrum of 4 in $\text{CDCl}_3$ at 400 MHz. ....                        | 33 |
| Figure S27. HMBC spectrum of 4 in $\text{CDCl}_3$ at 400 MHz.....                             | 33 |
| Figure S28. ROESY spectrum of 4 in $\text{CDCl}_3$ at 400 MHz. ....                           | 34 |
| Figure S29. $^1\text{H}$ NMR spectrum of 5 in $\text{CDCl}_3$ at 600 MHz. ....                | 35 |
| Figure S30. $^{13}\text{C}$ NMR spectrum of 5 in $\text{CDCl}_3$ at 100 MHz. ....             | 35 |
| Figure S31. $^1\text{H}$ - $^1\text{H}$ COSY spectrum of 5 in $\text{CDCl}_3$ at 600 MHz..... | 36 |
| Figure S32. HSQC spectrum of 5 in $\text{CDCl}_3$ at 600 MHz.....                             | 37 |
| Figure S33. HMBC spectrum of 5 in $\text{CDCl}_3$ at 600 MHz.....                             | 37 |
| Figure S34. NOESY spectrum of 5 in $\text{CDCl}_3$ at 600 MHz. ....                           | 38 |
| Figure S35. $^1\text{H}$ NMR spectrum of 6 in $\text{CDCl}_3$ at 400 MHz. ....                | 39 |
| Figure S36. $^{13}\text{C}$ NMR spectrum of 6 in $\text{CDCl}_3$ at 100 MHz. ....             | 39 |
| Figure S37. $^1\text{H}$ - $^1\text{H}$ COSY spectrum of 6 in $\text{CDCl}_3$ at 400 MHz..... | 40 |
| Figure S38. HSQC spectrum of 6 in $\text{CDCl}_3$ at 400 MHz.....                             | 41 |
| Figure S39. HMBC spectrum of 6 in $\text{CDCl}_3$ at 400 MHz.....                             | 41 |
| Figure S40. NOESY spectrum of 6 in $\text{CDCl}_3$ at 600 MHz. ....                           | 42 |
| Figure S41. $^1\text{H}$ NMR spectrum of 7 in $\text{CDCl}_3$ at 600 MHz. ....                | 43 |
| Figure S42. $^{13}\text{C}$ NMR spectrum of 7 in $\text{CDCl}_3$ at 150 MHz. ....             | 43 |
| Figure S43. ECD spectra of 4 and 7. ....                                                      | 44 |
| Figure S44. $^1\text{H}$ NMR spectrum of 8 in $\text{CD}_3\text{OD}$ at 400 MHz. ....         | 45 |

|                                                                                                                              |    |
|------------------------------------------------------------------------------------------------------------------------------|----|
| Figure S45. $^{13}\text{C}$ NMR spectrum of 8 in $\text{CD}_3\text{OD}$ at 100 MHz. ....                                     | 45 |
| Figure S46. $^1\text{H}$ NMR spectrum of 9 in $\text{CD}_3\text{OD}$ at 400 MHz. ....                                        | 46 |
| Figure S47. $^{13}\text{C}$ NMR spectrum of 9 in $\text{CD}_3\text{OD}$ at 100 MHz. ....                                     | 46 |
| Figure S48. $^1\text{H}$ NMR spectrum of authentic <i>O</i> -methylorcinol in $\text{CD}_3\text{OD}$ at 400 MHz.<br>.....    | 47 |
| Figure S49. $^{13}\text{C}$ NMR spectrum of authentic <i>O</i> -methylorcinol in $\text{CD}_3\text{OD}$ at 400 MHz.<br>..... | 47 |
| Figure S50. $^1\text{H}$ NMR spectrum of 10 in $\text{CDCl}_3$ at 400 MHz. ....                                              | 48 |
| Figure S51. $^{13}\text{C}$ NMR spectrum of 10 in $\text{CDCl}_3$ at 100 MHz. ....                                           | 48 |
| Figure S52. $^1\text{H}$ NMR spectrum of 11 in $\text{CDCl}_3$ at 600 MHz. ....                                              | 49 |
| Figure S53. $^{13}\text{C}$ NMR spectrum of 11 in $\text{CDCl}_3$ at 150 MHz. ....                                           | 49 |
| Figure S54. $^1\text{H}$ NMR spectrum of Ac-5 in $\text{CDCl}_3$ at 400 MHz. ....                                            | 50 |
| Figure S55. $^{13}\text{C}$ NMR spectrum of Ac-5 in $\text{CDCl}_3$ at 100 MHz. ....                                         | 50 |

## Supplementary Tables

**Table S1. NMR data for compound 1 in CDCl<sub>3</sub>.**

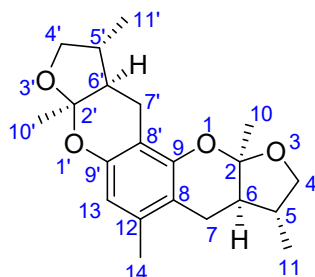

| No. | $\delta_C^a$ , type   | $\delta_H$ (J in Hz) <sup>b, c</sup>               | <sup>1</sup> H- <sup>1</sup> H COSY <sup>b</sup> | HMBC <sup>b</sup>                        | NOESY <sup>b</sup> |
|-----|-----------------------|----------------------------------------------------|--------------------------------------------------|------------------------------------------|--------------------|
| 2   | 107.3, C              |                                                    |                                                  |                                          |                    |
| 4   | 73.9, CH <sub>2</sub> | a: 4.16, t (8.4)<br>b: 3.52, t (8.4)               | 4b, 5<br>4a, 5                                   | 2, 5, 6, 11<br>2, 5, 11                  | 11<br>6, 11        |
| 5   | 35.5, CH              | 2.11                                               | 4a, 4b, 6, 11                                    | 4, 6, 7, 11                              |                    |
| 6   | 48.1, CH              | 1.93, ddd (10.8, 6.0, 1.8)                         | 5, 7a, 7b                                        | 8                                        | 4b, 10, 11         |
| 7   | 21.9, CH <sub>2</sub> | a: 2.71, dd (16.8, 6.0)<br>b: 2.67, dd (16.8, 1.8) | 6, 7b<br>6, 7a                                   | 2, 5, 6, 8, 9, 12<br>2, 5, 6, 8, 9, 12   | 11<br>10           |
| 8   | 109.1, C              |                                                    |                                                  |                                          |                    |
| 9   | 151.2, C              |                                                    |                                                  |                                          |                    |
| 10  | 23.2, CH <sub>3</sub> | 1.51, s                                            |                                                  | 2, 6                                     | 6, 7b              |
| 11  | 16.1, CH <sub>3</sub> | 1.06, d (6.6)                                      | 5                                                | 4, 5, 6                                  | 4a, 4b, 6, 7a      |
| 2'  | 106.9, C              |                                                    |                                                  |                                          |                    |
| 4'  | 74.0, CH <sub>2</sub> | a: 4.17, t (8.4)<br>b: 3.51, t (8.4)               | 4'b, 5'<br>4'a, 5'                               | 2', 5', 6', 11'<br>2', 5', 11'           | 11'<br>6', 11'     |
| 5'  | 35.5, CH              | 2.11                                               | 4'a, 4'b, 6', 11'                                | 4', 6', 7', 11'                          |                    |
| 6'  | 47.6, CH              | 1.88, br dd (10.8, 6.0)                            | 5', 7'a, 7'b                                     | 2', 5', 7', 8', 10', 11'                 | 4b, 10', 11'       |
| 7'  | 19.1, CH <sub>2</sub> | a: 2.88, br d (18.0)<br>b: 2.66, dd (18.0, 6.0)    | 6', 7'b<br>6', 7'a                               | 2', 5', 6', 8', 9'<br>2', 5', 6', 8', 9' | 11'<br>10'         |
| 8'  | 104.8, C              |                                                    |                                                  |                                          |                    |
| 9'  | 151.7, C              |                                                    |                                                  |                                          |                    |
| 10' | 22.5, CH <sub>3</sub> | 1.48, s                                            |                                                  | 2', 6'                                   | 6', 7'b            |
| 11' | 15.9, CH <sub>3</sub> | 1.04, d (6.6)                                      | 5'                                               | 4', 5', 6'                               | 4'a, 4'b, 6', 7'a  |
| 12  | 135.4, C              |                                                    |                                                  |                                          |                    |
| 13  | 110.5, CH             | 6.31, s                                            |                                                  | 8, 8', 9', 14                            | 14                 |
| 14  | 19.2, CH <sub>3</sub> | 2.16, s                                            |                                                  | 8, 12, 13                                | 13                 |

<sup>a</sup> The data were measured at 150 MHz.

<sup>b</sup> The data were measured at 600 MHz.

<sup>c</sup> The indiscernible signals from overlap or the complex multiplicity are reported without designating multiplicity.

**Table S2. NMR data for compound 2 in CDCl<sub>3</sub>.**

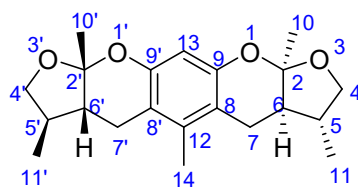

| No. | $\delta_C^a$ , type   | $\delta_H$ (J in Hz) <sup>b, c</sup> | <sup>1</sup> H- <sup>1</sup> H COSY <sup>b</sup> | HMBC <sup>b</sup>                                | NOESY <sup>b</sup> |
|-----|-----------------------|--------------------------------------|--------------------------------------------------|--------------------------------------------------|--------------------|
| 2   | 106.7, C              |                                      |                                                  |                                                  |                    |
| 4   | 73.9, CH <sub>2</sub> | a: 4.17, t (8.4)<br>b: 3.50, t (8.4) | 4b, 5<br>4a, 5                                   | 2, 5, 6, 11<br>2, 5, 11                          | 6, 11              |
| 5   | 35.4, CH              | 2.13                                 | 4a, 4b, 6, 11                                    | 4                                                |                    |
| 6   | 48.2, CH              | 1.91                                 | 5, 7a, 7b                                        | 8, 11                                            | 4b, 11             |
| 7   | 22.4, CH <sub>2</sub> | a: 2.76<br>b: 2.72                   | 6, 7b<br>6, 7a                                   | 2, 5, 6, 8, 9, 12<br>2, 5, 6, 8, 9, 12           |                    |
| 8   | 110.0, C              |                                      |                                                  |                                                  |                    |
| 9   | 152.3, C              |                                      |                                                  |                                                  |                    |
| 10  | 22.7, CH <sub>3</sub> | 1.49, s                              |                                                  | 2, 6                                             |                    |
| 11  | 16.0, CH <sub>3</sub> | 1.05, d (6.4)                        | 5                                                | 4, 5, 6                                          | 4b, 6              |
| 2'  | 106.7, C              |                                      |                                                  |                                                  |                    |
| 4'  | 73.9, CH <sub>2</sub> | a: 4.17, t (8.4)<br>b: 3.50, t (8.4) | 4'b, 5'<br>4'a, 5'                               | 2', 5', 6', 11'<br>2', 5', 11'                   | 6', 11'            |
| 5'  | 35.4, CH              | 2.13                                 | 4'a, 4'b, 6', 11'                                | 4'                                               |                    |
| 6'  | 48.2, CH              | 1.91                                 | 5', 7'a, 7'b                                     | 8', 11'                                          | 4'b, 11'           |
| 7'  | 22.4, CH <sub>2</sub> | a: 2.76<br>b: 2.72                   | 6', 7'b<br>6', 7'a                               | 2', 5', 6', 8', 9', 12<br>2', 5', 6', 8', 9', 12 |                    |
| 8'  | 110.0, C              |                                      |                                                  |                                                  |                    |
| 9'  | 152.3, C              |                                      |                                                  |                                                  |                    |
| 10' | 22.7, CH <sub>3</sub> | 1.49, s                              |                                                  | 2', 6'                                           |                    |
| 11' | 16.0, CH <sub>3</sub> | 1.05, d (6.4)                        | 5'                                               | 4', 5', 6'                                       | 4'b, 6'            |
| 12  | 135.1, C              |                                      |                                                  |                                                  |                    |
| 13  | 103.1, CH             | 6.25, s                              |                                                  | 8, 8', 9, 9'                                     |                    |
| 14  | 14.8, CH <sub>3</sub> | 2.13, s                              |                                                  | 8, 8', 12                                        |                    |

<sup>a</sup> The data were measured at 100 MHz.

<sup>b</sup> The data were measured at 400 MHz.

<sup>c</sup> The indiscernible signals from overlap or the complex multiplicity are reported without designating multiplicity.

**Table S3. NMR data for compound 3 in CDCl<sub>3</sub>.**

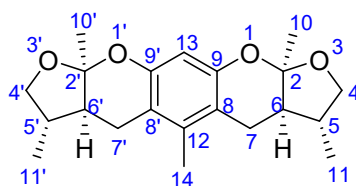

| No. | $\delta_C^a$ , type   | $\delta_H$ (J in Hz) <sup>b, d</sup>               | <sup>1</sup> H- <sup>1</sup> H COSY <sup>b</sup> | HMBC <sup>c</sup>                                | NOESY <sup>c</sup> |
|-----|-----------------------|----------------------------------------------------|--------------------------------------------------|--------------------------------------------------|--------------------|
| 2   | 106.6, C              |                                                    |                                                  |                                                  |                    |
| 4   | 73.9, CH <sub>2</sub> | a: 4.17, t (8.4)<br>b: 3.51, t (8.4)               | 4b, 5<br>4a, 5                                   | 2, 5, 6, 11<br>2, 5, 11                          | 6, 11              |
| 5   | 35.4, CH              | 2.14                                               | 4a, 4b, 6, 11                                    | 4, 6, 7                                          |                    |
| 6   | 48.3, CH              | 1.91, ddd (10.8, 6.0, 2.4)                         | 5, 7a, 7b                                        | 2, 5, 8, 10, 11                                  | 4b, 10, 11         |
| 7   | 22.4, CH <sub>2</sub> | a: 2.76, dd (16.0, 5.6)<br>b: 2.71, dd (16.0, 2.4) | 6, 7b<br>6, 7a                                   | 2, 5, 6, 8, 9, 12<br>2, 5, 6, 8, 9, 12           |                    |
| 8   | 109.9, C              |                                                    |                                                  |                                                  |                    |
| 9   | 152.3, C              |                                                    |                                                  |                                                  |                    |
| 10  | 22.6, CH <sub>3</sub> | 1.49, s                                            |                                                  | 2, 6                                             | 6                  |
| 11  | 16.0, CH <sub>3</sub> | 1.05, d (6.8)                                      | 5                                                | 4, 5, 6                                          | 4b, 6              |
| 2'  | 106.6, C              |                                                    |                                                  |                                                  |                    |
| 4'  | 73.9, CH <sub>2</sub> | a: 4.17, t (8.4)<br>b: 3.51, t (8.4)               | 4'b, 5'<br>4'a, 5'                               | 2', 5', 6', 11'<br>2', 5', 11'                   | 6', 11'            |
| 5'  | 35.4, CH              | 2.14                                               | 4'a, 4'b, 6', 11'                                | 4', 6', 7'                                       |                    |
| 6'  | 48.3, CH              | 1.91, ddd (10.8, 6.0, 2.4)                         | 5', 7'a, 7'b                                     | 2', 5', 8', 10', 11'                             | 4'b, 10', 11'      |
| 7'  | 22.4, CH <sub>2</sub> | a: 2.76, dd (16.0, 5.6)<br>b: 2.71, dd (16.0, 2.4) | 6', 7'b<br>6', 7'a                               | 2', 5', 6', 8', 9', 12<br>2', 5', 6', 8', 9', 12 |                    |
| 8'  | 109.9, C              |                                                    |                                                  |                                                  |                    |
| 9'  | 152.3, C              |                                                    |                                                  |                                                  |                    |
| 10' | 22.6, CH <sub>3</sub> | 1.49, s                                            |                                                  | 2', 6'                                           | 6'                 |
| 11' | 16.0, CH <sub>3</sub> | 1.05, d (6.8)                                      | 5'                                               | 4', 5', 6'                                       | 4'b, 6'            |
| 12  | 135.1, C              |                                                    |                                                  |                                                  |                    |
| 13  | 103.1, CH             | 6.25, s                                            |                                                  | 8, 8', 9, 9'                                     |                    |
| 14  | 14.8, CH <sub>3</sub> | 2.12, s                                            |                                                  | 8, 8', 12                                        |                    |

<sup>a</sup> The data were measured at 100 MHz.

<sup>b</sup> The data were measured at 400 MHz.

<sup>c</sup> The data were measured at 600 MHz.

<sup>d</sup> The indiscernible signals from overlap or the complex multiplicity are reported without designating multiplicity.

**Table S4. NMR data for compound 4 in CDCl<sub>3</sub>.**

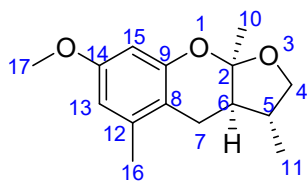

| No. | $\delta_C^a$ , type   | $\delta_H$ (J in Hz) <sup>b, c</sup>               | <sup>1</sup> H- <sup>1</sup> H COSY <sup>b</sup> | HMBC <sup>b</sup>                      | ROESY <sup>b</sup> |
|-----|-----------------------|----------------------------------------------------|--------------------------------------------------|----------------------------------------|--------------------|
| 2   | 107.1, C              |                                                    |                                                  |                                        |                    |
| 4   | 74.0, CH <sub>2</sub> | a: 4.18, t (8.0)<br>b: 3.52, t (8.0)               | 4b, 5<br>4a, 5                                   | 2, 5, 6, 11<br>2, 5, 11                | 6, 11              |
| 5   | 35.4, CH              | 2.13                                               | 4a, 4b, 6, 11                                    |                                        |                    |
| 6   | 48.2, CH              | 1.93, ddd (10.8, 5.6, 2.0)                         | 5, 7a, 7b                                        | 5, 8                                   | 4b, 10, 11         |
| 7   | 21.6, CH <sub>2</sub> | a: 2.73, dd (16.8, 5.6)<br>b: 2.68, dd (16.8, 2.0) | 6, 7b<br>6, 7a                                   | 2, 5, 6, 8, 9, 12<br>2, 5, 6, 8, 9, 12 | 10                 |
| 8   | 109.4, C              |                                                    |                                                  |                                        |                    |
| 9   | 153.8, C              |                                                    |                                                  |                                        |                    |
| 10  | 22.8, CH <sub>3</sub> | 1.51, s                                            |                                                  | 2, 6                                   | 6, 7b              |
| 11  | 15.9, CH <sub>3</sub> | 1.06, d (6.4)                                      | 5                                                | 4, 5, 6                                | 4b, 6              |
| 12  | 137.9, C              |                                                    |                                                  |                                        |                    |
| 13  | 109.2, CH             | 6.36, d (2.4)                                      | 15                                               | 8, 14, 15, 16                          | 17                 |
| 14  | 158.8, C              |                                                    |                                                  |                                        |                    |
| 15  | 99.6, CH              | 6.28, d (2.4)                                      | 13                                               | 8, 9, 13, 14                           | 17                 |
| 16  | 19.5, CH <sub>3</sub> | 2.21, s                                            |                                                  | 8, 12, 13                              |                    |
| 17  | 55.1, CH <sub>3</sub> | 3.73, s                                            |                                                  | 14                                     | 13, 15             |

<sup>a</sup> The data were measured at 100 MHz.

<sup>b</sup> The data were measured at 400 MHz.

<sup>c</sup> The indiscernible signals from overlap or the complex multiplicity are reported without designating multiplicity.



**Table S5. NMR data for compound 5 in CDCl<sub>3</sub>.**

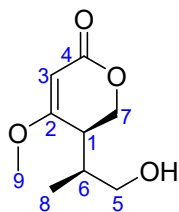

| No. | $\delta_C^a$ , type   | $\delta_H$ (J in Hz) <sup>b</sup>                  | <sup>1</sup> H- <sup>1</sup> H COSY <sup>b</sup> | HMBC <sup>b</sup>        | NOESY <sup>b</sup>           |
|-----|-----------------------|----------------------------------------------------|--------------------------------------------------|--------------------------|------------------------------|
| 1   | 39.0, CH              | 2.43, ddd (6.0, 4.2, 2.4)                          | 6, 7a, 7b                                        | 2, 3, 5, 6, 7, 8         | 5a, 5b, 8                    |
| 2   | 175.4, C              |                                                    |                                                  |                          |                              |
| 3   | 90.5, CH              | 5.05, s                                            |                                                  | 1, 2, 4                  | 9                            |
| 4   | 167.3, C              |                                                    |                                                  |                          |                              |
| 5   | 65.1, CH <sub>2</sub> | a: 3.49, dd (10.8, 6.0)<br>b: 3.45, dd (10.8, 6.0) | 5b, 6<br>5a, 6                                   | 1, 6, 8<br>1, 6, 8       | 1, 7a, 7b, 8<br>1, 7a, 7b, 8 |
| 6   | 36.6, CH              | 1.99, sept (6.0)                                   | 1, 5a, 5b, 8                                     | 1, 2, 5, 7, 8            | 7a, 7b                       |
| 7   | 68.2, CH <sub>2</sub> | a: 4.30, dd (11.4, 2.4)<br>b: 4.27, dd (11.4, 4.2) | 1, 7b<br>1, 7a                                   | 1, 2, 4, 6<br>1, 2, 4, 6 | 5a, 5b, 6, 8<br>5a, 5b, 6, 8 |
| 8   | 14.1, CH <sub>3</sub> | 0.88, d (7.2)                                      | 6                                                | 1, 5, 6                  | 1, 5a, 5b, 7a, 7b            |
| 9   | 55.7, CH <sub>3</sub> | 3.66, s                                            |                                                  | 2                        | 3                            |

<sup>a</sup> The data were measured at 100 MHz.

<sup>b</sup> The data were measured at 600 MHz.

**Table S6. Mean absolute error (MAE) values, R square (R<sup>2</sup>) of the linear correlations, and DP4+ probability analysis of 5a and 5b.**

| No.              | 5     | 5a    | AE     | 5b    | AE     |
|------------------|-------|-------|--------|-------|--------|
| C-1              | 39.0  | 41.7  | 2.7    | 40.9  | 1.9    |
| C-2              | 175.4 | 176.7 | 1.3    | 177.1 | 1.7    |
| C-3              | 90.5  | 91.5  | 1.0    | 90.5  | 0.0    |
| C-4              | 167.3 | 166.2 | 1.1    | 165.8 | 1.5    |
| C-5              | 65.1  | 63.4  | 1.7    | 64.9  | 0.2    |
| C-6              | 36.6  | 39.0  | 2.4    | 38.3  | 1.7    |
| C-7              | 68.2  | 66.1  | 2.1    | 67.0  | 1.2    |
| C-8              | 14.1  | 12.9  | 1.2    | 13.5  | 0.6    |
| C-9              | 55.7  | 54.5  | 1.2    | 53.7  | 2.0    |
| MAE              |       |       | 1.62   |       | 1.22   |
| R <sup>2</sup>   |       |       | 0.9988 |       | 0.9992 |
| DP4 <sup>+</sup> |       |       | 0.35%  |       | 99.65% |

**Table S7. NMR data for compound 6 in CDCl<sub>3</sub>.**

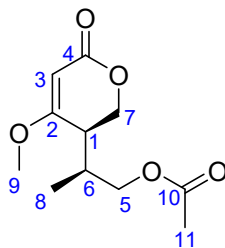

| No. | $\delta_c^a$ , type   | $\delta_H$ (J in Hz) <sup>b, c</sup>               | <sup>1</sup> H- <sup>1</sup> H COSY <sup>b</sup> | HMBC <sup>b</sup>     | NOESY <sup>b</sup> |
|-----|-----------------------|----------------------------------------------------|--------------------------------------------------|-----------------------|--------------------|
| 1   | 39.4, CH              | 2.45                                               | 6, 7a, 7b                                        | 2, 6                  | 5, 8               |
| 2   | 174.1, C              |                                                    |                                                  |                       |                    |
| 3   | 91.4, CH              | 5.18, s                                            |                                                  | 1, 2, 4               | 9                  |
| 4   | 166.5, C              |                                                    |                                                  |                       |                    |
| 5   | 66.9, CH <sub>2</sub> | 4.02, d (6.4)                                      | 6                                                | 1, 6, 8, 10           | 1, 8               |
| 6   | 33.9, CH              | 2.27, sept (6.4)                                   | 1, 5, 8                                          |                       | 7b                 |
| 7   | 67.9, CH <sub>2</sub> | a: 4.38, dd (11.6, 4.4)<br>b: 4.32, dd (11.6, 2.4) | 1, 7b<br>1, 7a                                   | 2, 4, 6<br>1, 2, 4, 6 | 6, 8               |
| 8   | 14.4, CH <sub>3</sub> | 1.01, d (7.2)                                      | 6                                                | 1, 5, 6               | 1, 5, 7b           |
| 9   | 55.8, CH <sub>3</sub> | 3.74, s                                            |                                                  | 2                     | 3                  |
| 10  | 170.8, C              |                                                    |                                                  |                       |                    |
| 11  | 20.8, CH <sub>3</sub> | 2.05, s                                            |                                                  | 10                    |                    |

<sup>a</sup> The data were measured at 100 MHz.

<sup>b</sup> The data were measured at 400 MHz.

<sup>c</sup> The indiscernible signals from overlap or the complex multiplicity are reported without designating multiplicity.

**Table S8.**  $^1\text{H}$  and  $^{13}\text{C}$  NMR data for Ac-5 in  $\text{CDCl}_3$ .

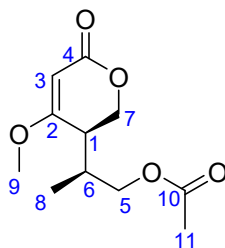

| No. | $\delta_{\text{C}}^a$ , type | $\delta_{\text{H}}$ (J in Hz) <sup>b, c</sup>      |
|-----|------------------------------|----------------------------------------------------|
| 1   | 39.5, CH                     | 2.45                                               |
| 2   | 174.1, C                     |                                                    |
| 3   | 91.4, CH                     | 5.19, s                                            |
| 4   | 166.5, C                     |                                                    |
| 5   | 66.9, CH <sub>2</sub>        | 4.03, d (6.4)                                      |
| 6   | 33.9, CH                     | 2.28, sept (6.4)                                   |
| 7   | 67.9, CH <sub>2</sub>        | a: 4.39, dd (11.6, 4.0)<br>b: 4.33, dd (11.6, 2.4) |
| 8   | 14.4, CH <sub>3</sub>        | 1.02, d (7.2)                                      |
| 9   | 55.9, CH <sub>3</sub>        | 3.74, s                                            |
| 10  | 170.8, C                     |                                                    |
| 11  | 20.8, CH <sub>3</sub>        | 2.06, s                                            |

<sup>a</sup> The data were measured at 100 MHz.

<sup>b</sup> The data were measured at 400 MHz.

<sup>c</sup> The indiscernible signals from overlap or the complex multiplicity are reported without designating multiplicity.

**Table S9.  $^1\text{H}$  and  $^{13}\text{C}$  NMR data for 7 in  $\text{CDCl}_3$ .**

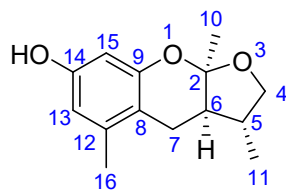

| No. | $\delta_{\text{C}}^a$ , type | $\delta_{\text{H}}$ (J in Hz) <sup>b, c</sup>      |
|-----|------------------------------|----------------------------------------------------|
| 2   | 107.1, C                     |                                                    |
| 4   | 74.0, $\text{CH}_2$          | a: 4.17, t (8.4)<br>b: 3.51, t (8.4)               |
| 5   | 35.4, CH                     | 2.13                                               |
| 6   | 48.1, CH                     | 1.93, ddd (10.8, 5.4, 1.8)                         |
| 7   | 21.5, $\text{CH}_2$          | a: 2.71, dd (16.8, 5.4)<br>b: 2.66, dd (16.8, 1.8) |
| 8   | 109.6, C                     |                                                    |
| 9   | 153.8, C                     |                                                    |
| 10  | 22.8, $\text{CH}_3$          | 1.51, s                                            |
| 11  | 15.9, $\text{CH}_3$          | 1.05, d (6.6)                                      |
| 12  | 138.3, C                     |                                                    |
| 13  | 109.6, C                     | 6.29, br s                                         |
| 14  | 154.6, C                     |                                                    |
| 15  | 101.6, CH                    | 6.22, br s                                         |
| 16  | 19.4, $\text{CH}_3$          | 2.19, s                                            |

<sup>a</sup> The data were measured at 150 MHz.

<sup>b</sup> The data were measured at 600 MHz.

<sup>c</sup> The indiscernible signals from overlap or the complex multiplicity are reported without designating multiplicity.

**Table S10.**  $^1\text{H}$  and  $^{13}\text{C}$  NMR data for **8** in  $\text{CD}_3\text{OD}$ .

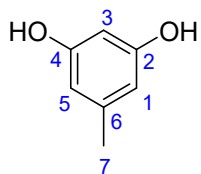

| No. | $\delta_{\text{C}}^a$ , type | $\delta_{\text{H}}$ (J in Hz) <sup>b</sup> |
|-----|------------------------------|--------------------------------------------|
| 1   | 108.5, CH                    | 6.10, br s                                 |
| 2   | 159.3, C                     |                                            |
| 3   | 100.7, CH                    | 6.05, br s                                 |
| 4   | 159.3, C                     |                                            |
| 5   | 108.5, CH                    | 6.10, br s                                 |
| 6   | 141.1, C                     |                                            |
| 7   | 21.6, CH <sub>3</sub>        | 2.16, s                                    |

<sup>a</sup> The data were measured at 100 MHz.

<sup>b</sup> The data were measured at 400 MHz.

**Table S11. <sup>1</sup>H and <sup>13</sup>C NMR data for 9 in CD<sub>3</sub>OD.**

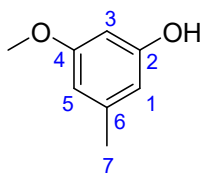

| No.                | $\delta_C^a$ , type   | $\delta_H$ (J in Hz) <sup>b</sup> |
|--------------------|-----------------------|-----------------------------------|
| 1                  | 109.6, CH             | 6.20, br s                        |
| 2                  | 159.4, C              |                                   |
| 3                  | 99.4, CH              | 6.14, br s                        |
| 4                  | 162.2, C              |                                   |
| 5                  | 107.0, CH             | 6.21, br s                        |
| 6                  | 141.2, C              |                                   |
| 7                  | 21.7, CH <sub>3</sub> | 2.20, s                           |
| 4-OCH <sub>3</sub> | 55.5, CH <sub>3</sub> | 3.69, s                           |

<sup>a</sup> The data were measured at 100 MHz.

<sup>b</sup> The data were measured at 400 MHz.

**Table S12.**  $^1\text{H}$  and  $^{13}\text{C}$  NMR data for **10** in  $\text{CDCl}_3$ .

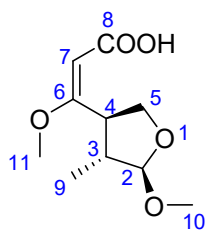

| No. | $\delta_{\text{C}}^a$ , type | $\delta_{\text{H}}$ ( $J$ in Hz) <sup>b, c</sup> |
|-----|------------------------------|--------------------------------------------------|
| 2   | 112.1, CH                    | 4.65, d (3.6)                                    |
| 3   | 44.3, CH                     | 2.41                                             |
| 4   | 47.5, CH                     | 4.21                                             |
| 5   | 69.0, $\text{CH}_2$          | a: 4.02, t (7.8)<br>b: 3.88, dd (10.2, 7.8)      |
| 6   | 173.7, C                     |                                                  |
| 7   | 92.6, CH                     | 5.11, s                                          |
| 8   | 172.6, C                     |                                                  |
| 9   | 16.1, $\text{CH}_3$          | 1.10, d (7.2)                                    |
| 10  | 55.8, $\text{CH}_3$          | 3.39, s                                          |
| 11  | 56.0, $\text{CH}_3$          | 3.67, s                                          |

<sup>a</sup> The data were measured at 150 MHz.

<sup>b</sup> The data were measured at 600 MHz.

<sup>c</sup> The indiscernible signals from overlap or the complex multiplicity are reported without designating multiplicity.



**Table S13. <sup>1</sup>H and <sup>13</sup>C NMR data for 11 in CDCl<sub>3</sub>.**

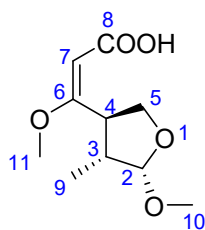

| No. | $\delta_C^a$ , type   | $\delta_H$ (J in Hz) <sup>b, c</sup> |
|-----|-----------------------|--------------------------------------|
| 2   | 106.5, CH             | 4.83, d (4.2)                        |
| 3   | 42.6, CH              | 2.43                                 |
| 4   | 44.5, CH              | 4.38                                 |
| 5   | 69.5, CH <sub>2</sub> | a: 4.14, t (8.4)<br>b: 3.80, t (8.4) |
| 6   | 175.1, C              |                                      |
| 7   | 92.9, CH              | 5.12, s                              |
| 8   | 172.6, C              |                                      |
| 9   | 11.4, CH <sub>3</sub> | 0.99, d (6.6)                        |
| 10  | 54.6, CH <sub>3</sub> | 3.35, s                              |
| 11  | 56.0, CH <sub>3</sub> | 3.68, s                              |

<sup>a</sup> The data were measured at 150 MHz.

<sup>b</sup> The data were measured at 600 MHz.

<sup>c</sup> The indiscernible signals from overlap or the complex multiplicity are reported without designating multiplicity.

**Table S14.**  $^1\text{H}$  and  $^{13}\text{C}$  NMR data for authentic *O*-methylorcinol in  $\text{CD}_3\text{OD}$ .

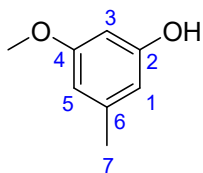

| No.                | $\delta_{\text{C}}^a$ , type | $\delta_{\text{H}}$ ( <i>J</i> in Hz) <sup>b</sup> |
|--------------------|------------------------------|----------------------------------------------------|
| 1                  | 109.6, CH                    | 6.20, br s                                         |
| 2                  | 159.3, C                     |                                                    |
| 3                  | 99.4, CH                     | 6.14, br s                                         |
| 4                  | 162.2, C                     |                                                    |
| 5                  | 107.0, CH                    | 6.21, br s                                         |
| 6                  | 141.2, C                     |                                                    |
| 7                  | 21.7, CH <sub>3</sub>        | 2.20, s                                            |
| 4-OCH <sub>3</sub> | 55.4, CH <sub>3</sub>        | 3.70, s                                            |

<sup>a</sup> The data were measured at 100 MHz.

<sup>b</sup> The data were measured at 400 MHz.

## Supplementary Figures

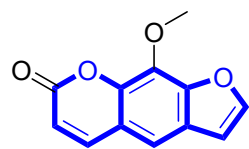

8-Methoxypsoralen

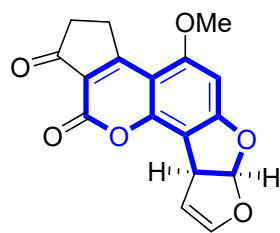

Aflatoxin B<sub>1</sub>

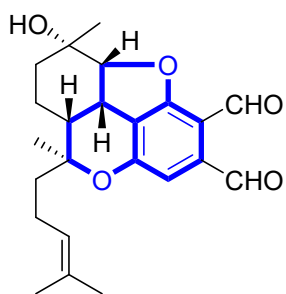

Bisabosqual A

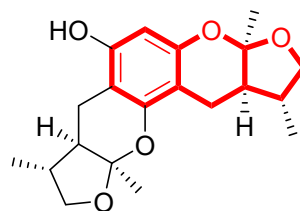

Xyloketal B

**Figure S1. Representative natural products containing furan-fused chromene units.**

**(1*R*<sup>\*</sup>, 6*R*<sup>\*</sup>)-5a**

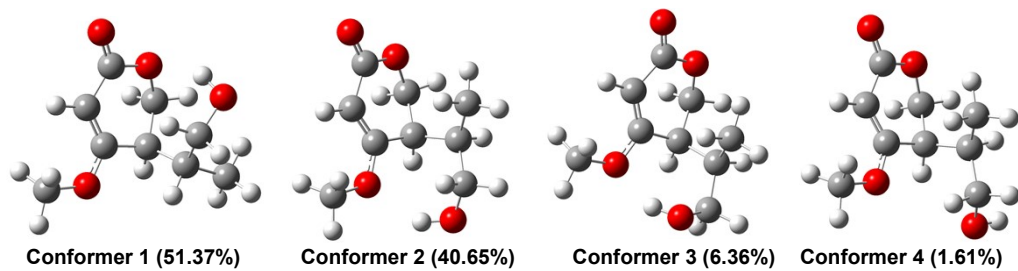

**(1*S*<sup>\*</sup>, 6*R*<sup>\*</sup>)-5b**

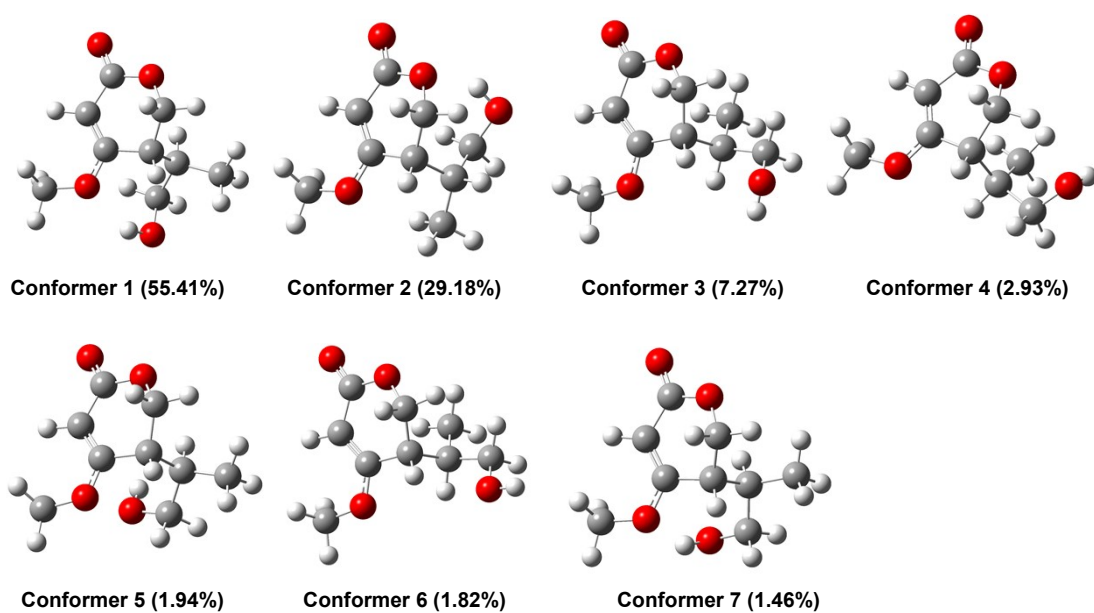

**Figure S2. Most stable conformers of (1*R*<sup>\*</sup>, 6*R*<sup>\*</sup>)-5a and (1*S*<sup>\*</sup>, 6*R*<sup>\*</sup>)-5b.**  
The number in the parenthesis signifies the relative population.

**(1*R*, 6*S*)-5**

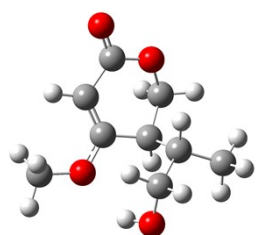

**Conformer 1 (56.50%)**

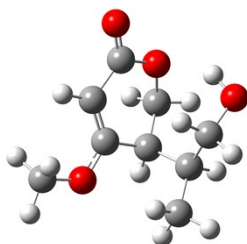

**Conformer 2 (29.76%)**

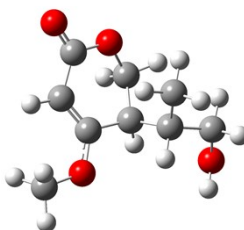

**Conformer 3 (7.41%)**

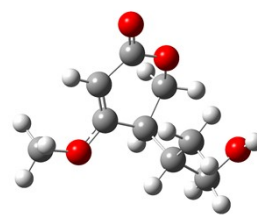

**Conformer 4 (2.98%)**

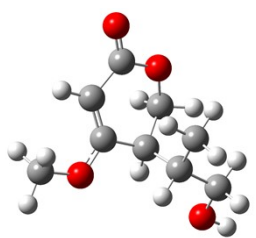

**Conformer 5 (1.86%)**

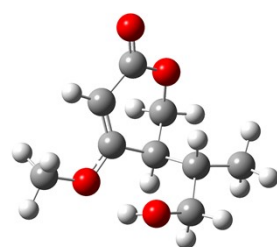

**Conformer 6 (1.48%)**

**Figure S3. Most stable conformers of (1*R*, 6*S*)-5.**  
The number in the parenthesis signifies the relative population.

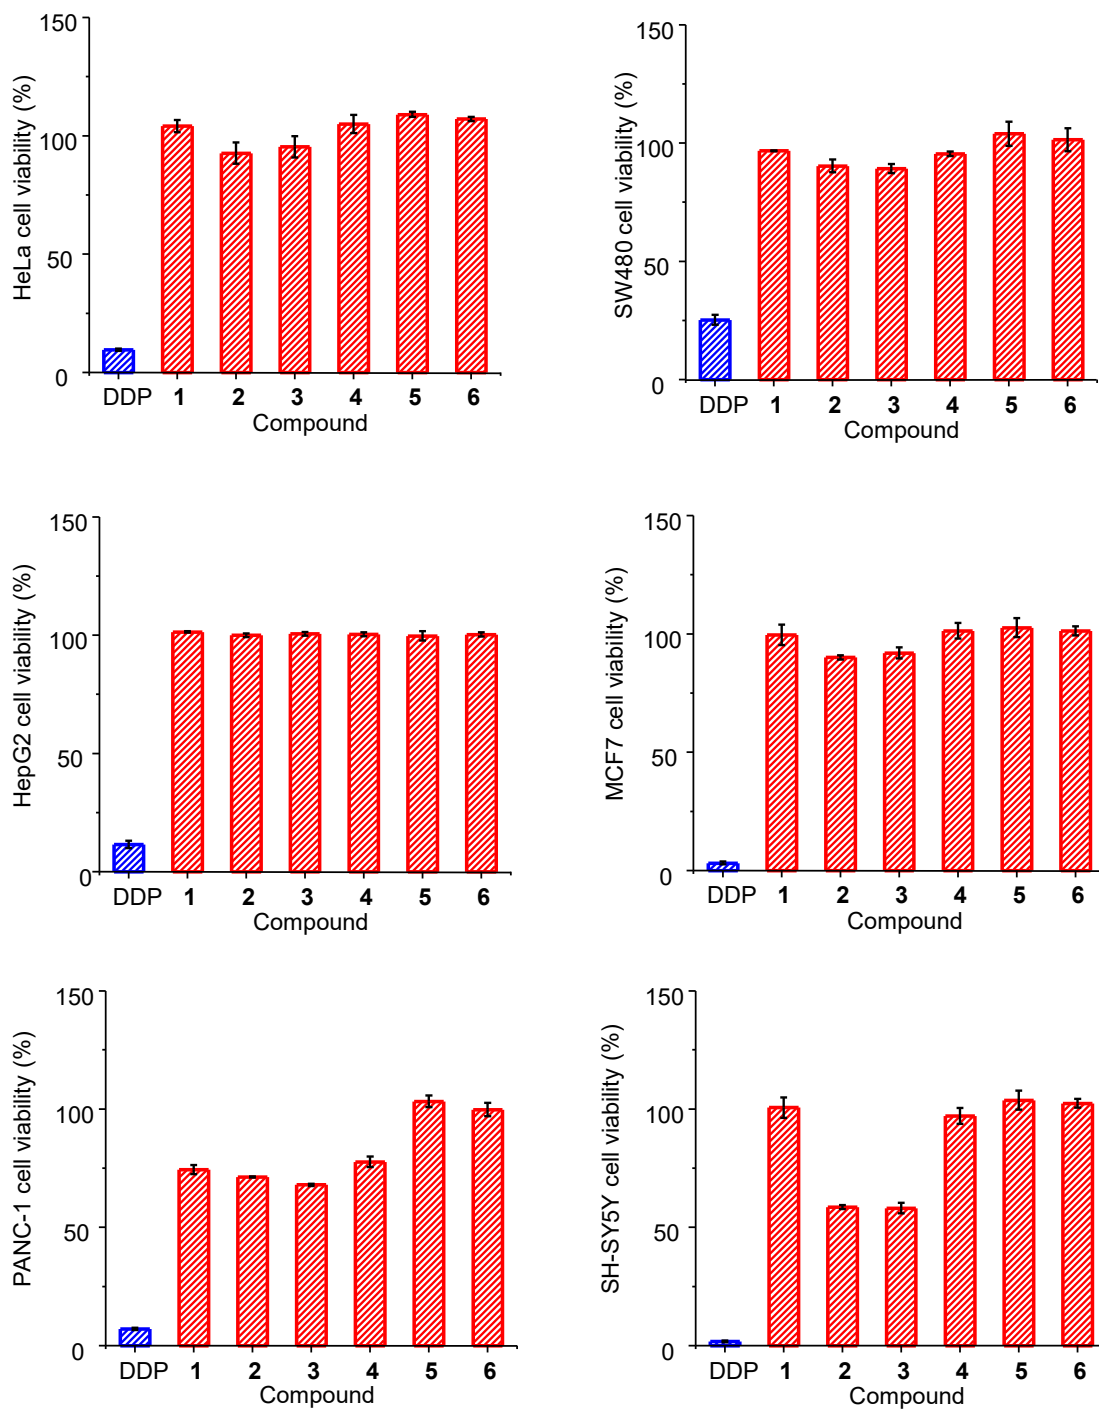

**Figure S4. Cell viability of human cancer cells supplemented with the tested compound.**

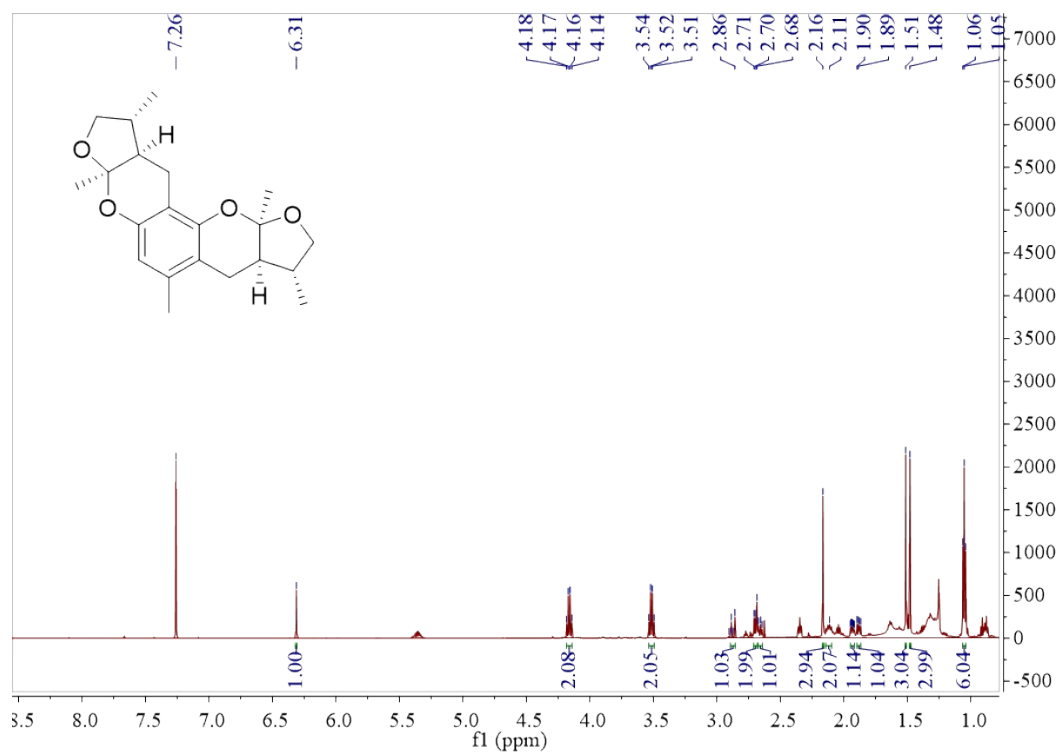

Figure S5. <sup>1</sup>H NMR spectrum of 1 in CDCl<sub>3</sub> at 600 MHz.

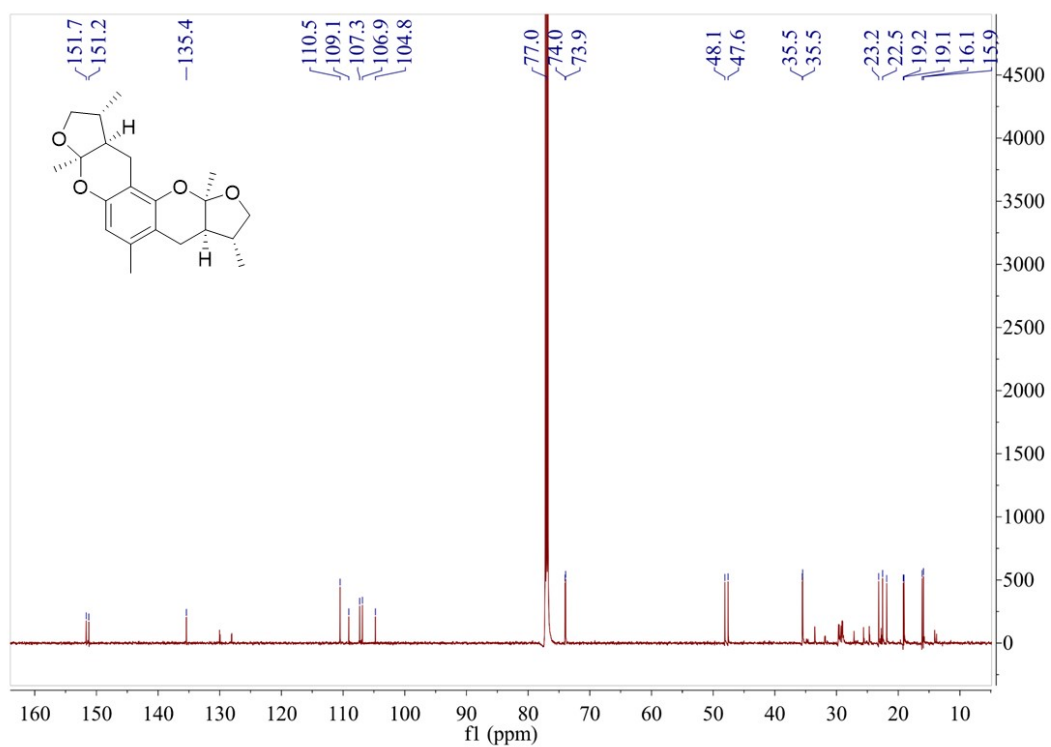

Figure S6. <sup>13</sup>C NMR spectrum of 1 in CDCl<sub>3</sub> at 150 MHz.

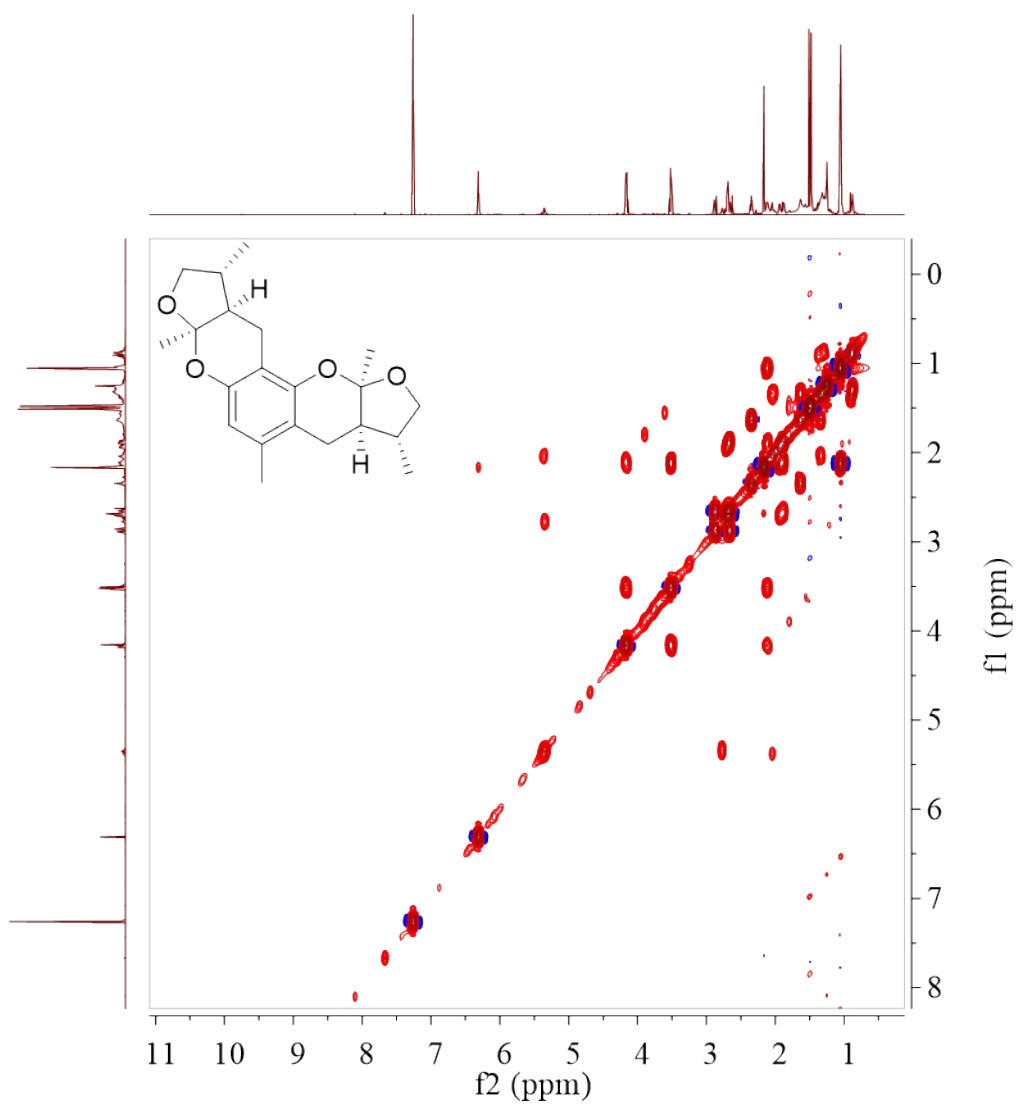

**Figure S7.** <sup>1</sup>H-<sup>1</sup>H COSY spectrum of 1 in CDCl<sub>3</sub> at 600 MHz.



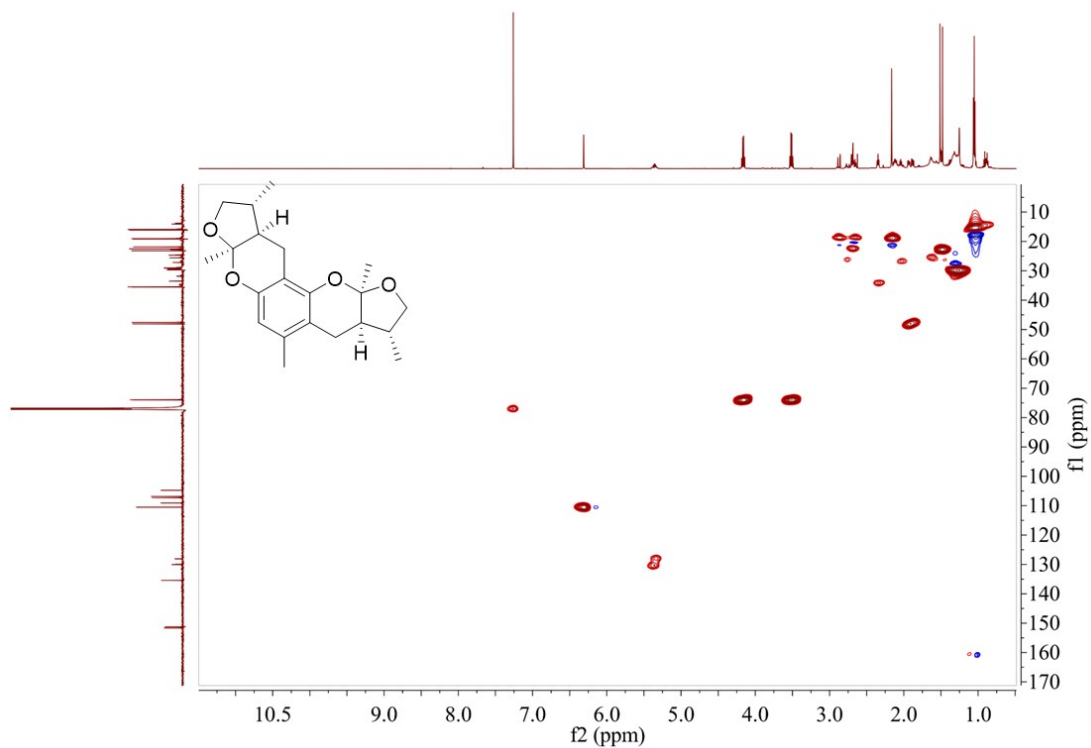

**Figure S8.** HSQC spectrum of 1 in CDCl<sub>3</sub> at 600 MHz.

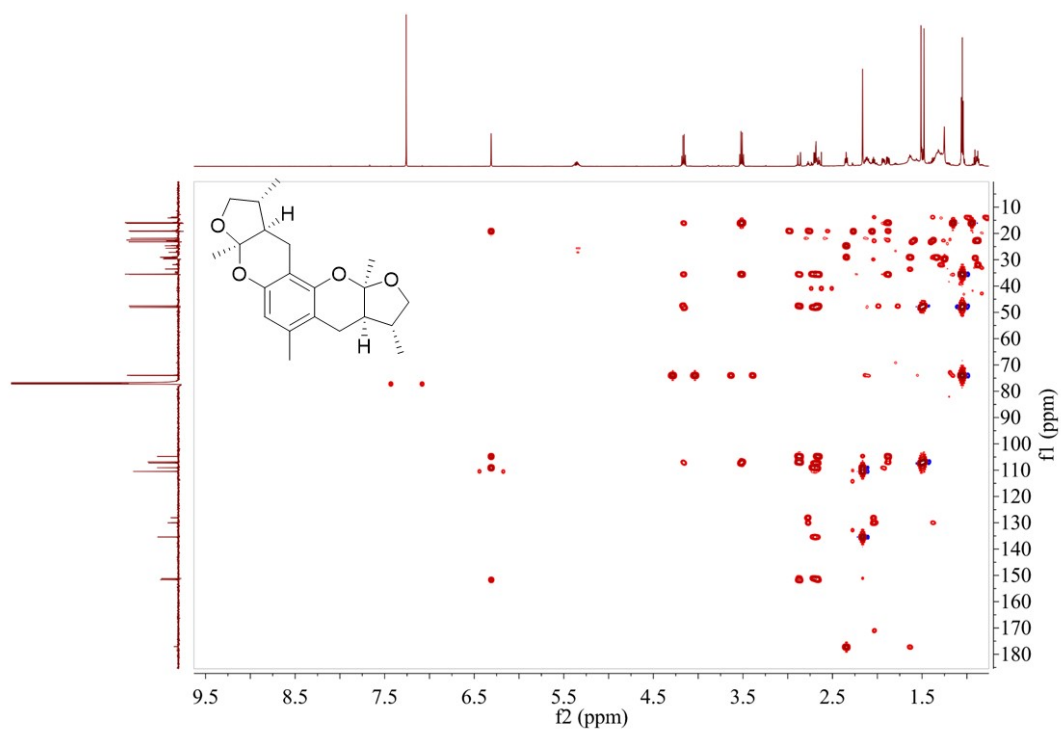

**Figure S9.** HMBC spectrum of 1 in CDCl<sub>3</sub> at 600 MHz.

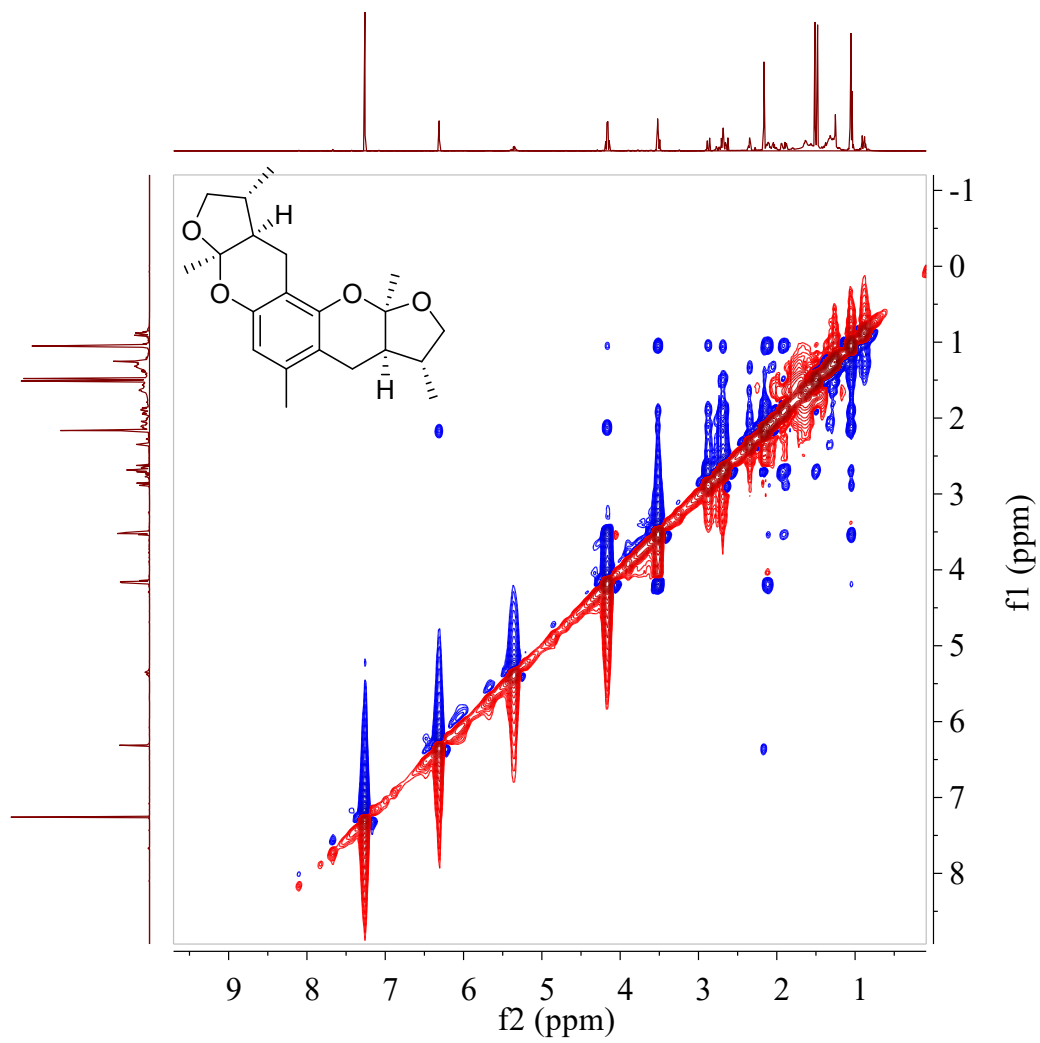

**Figure S10. NOESY spectrum of 1 in CDCl<sub>3</sub> at 600 MHz.**

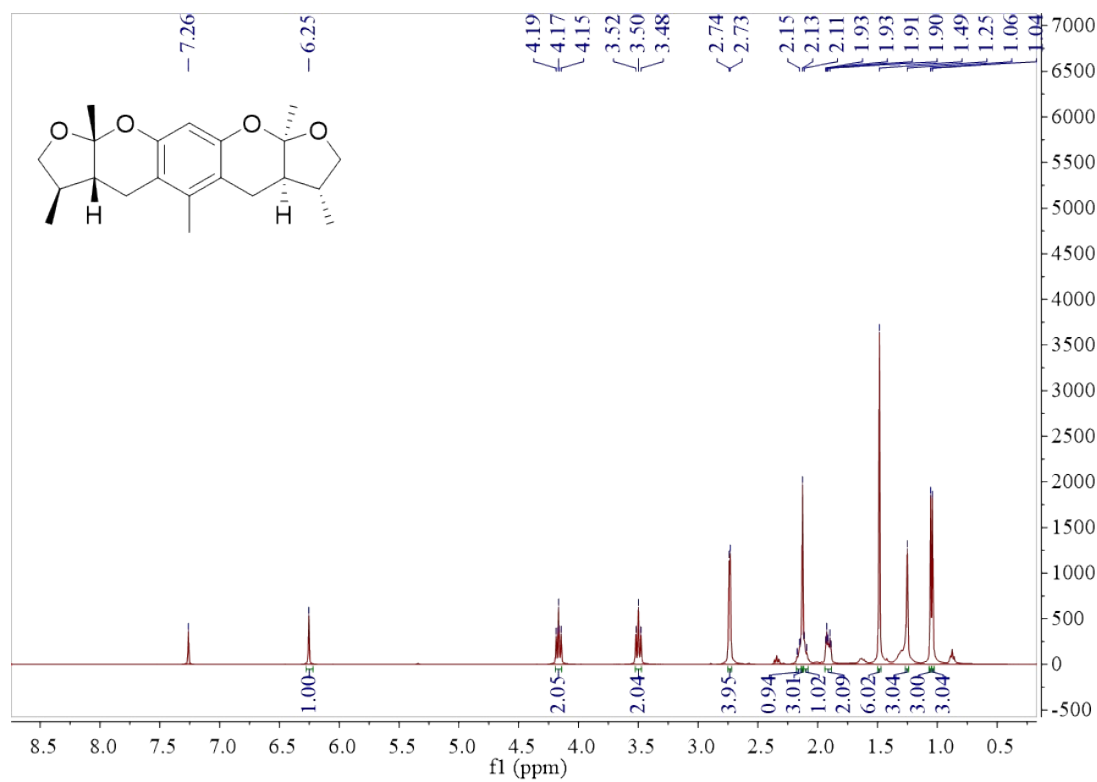

Figure S11.  $^1\text{H}$  NMR spectrum of 2 in  $\text{CDCl}_3$  at 400 MHz.

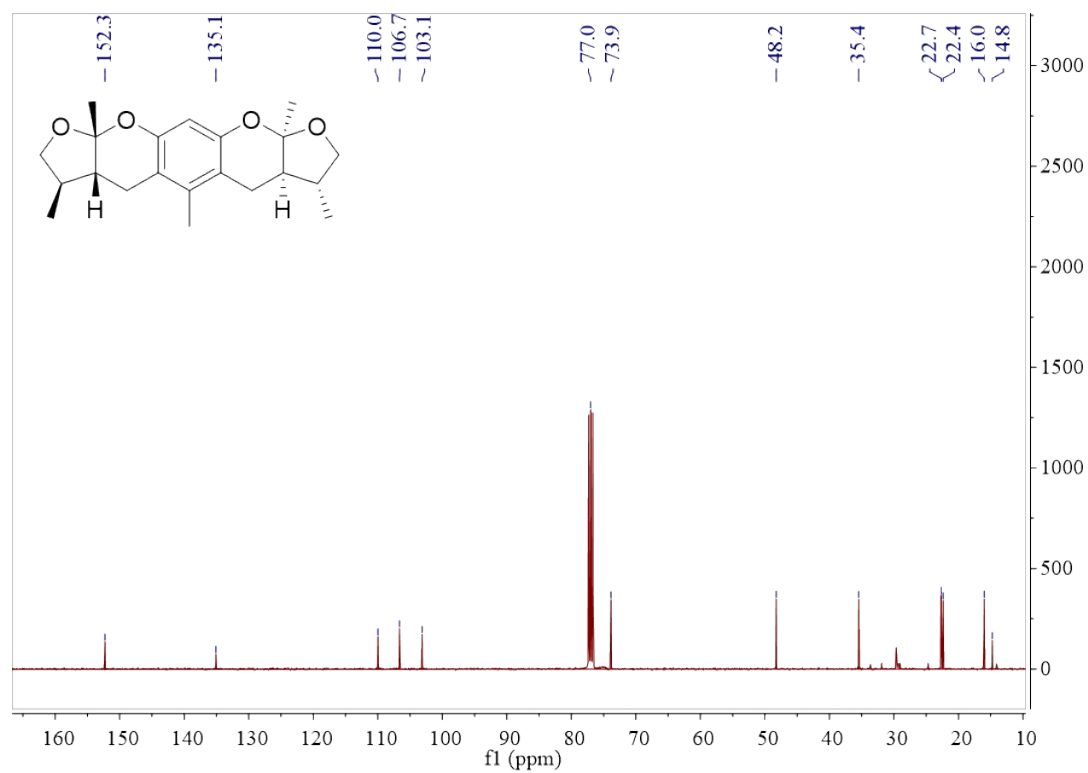

Figure S12.  $^{13}\text{C}$  NMR spectrum of 2 in  $\text{CDCl}_3$  at 100 MHz.

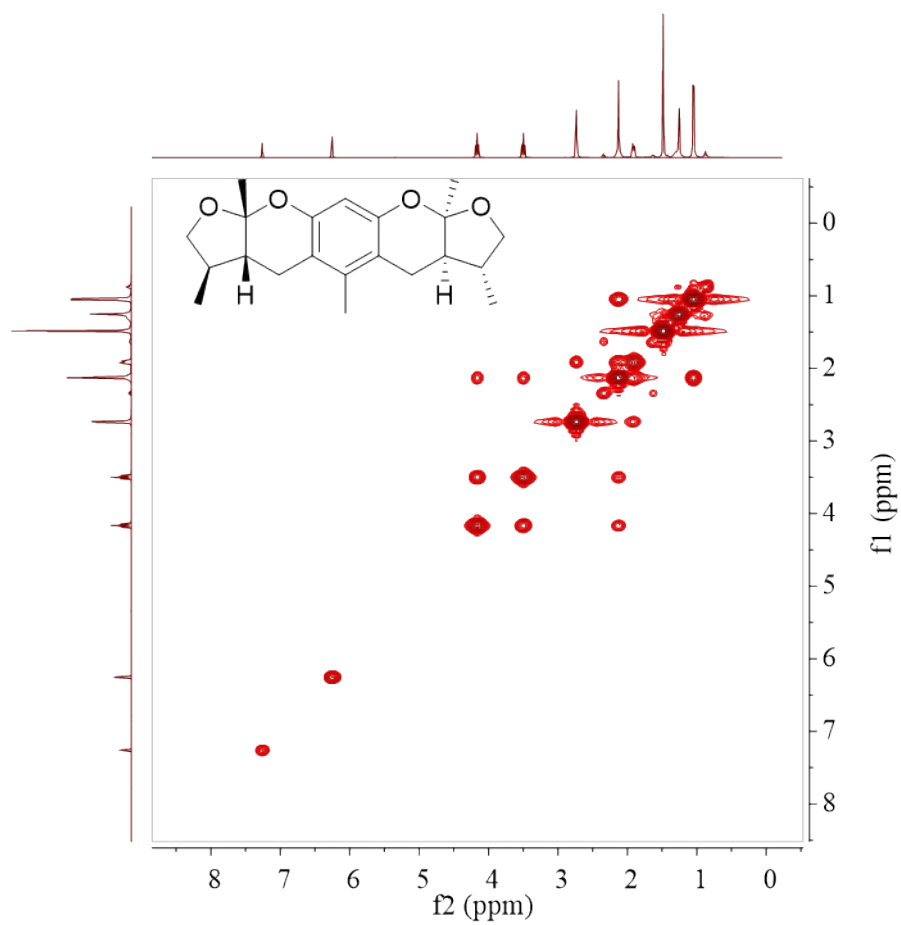

Figure S13.  $^1\text{H}$ - $^1\text{H}$  COSY spectrum of **2** in  $\text{CDCl}_3$  at 400 MHz.

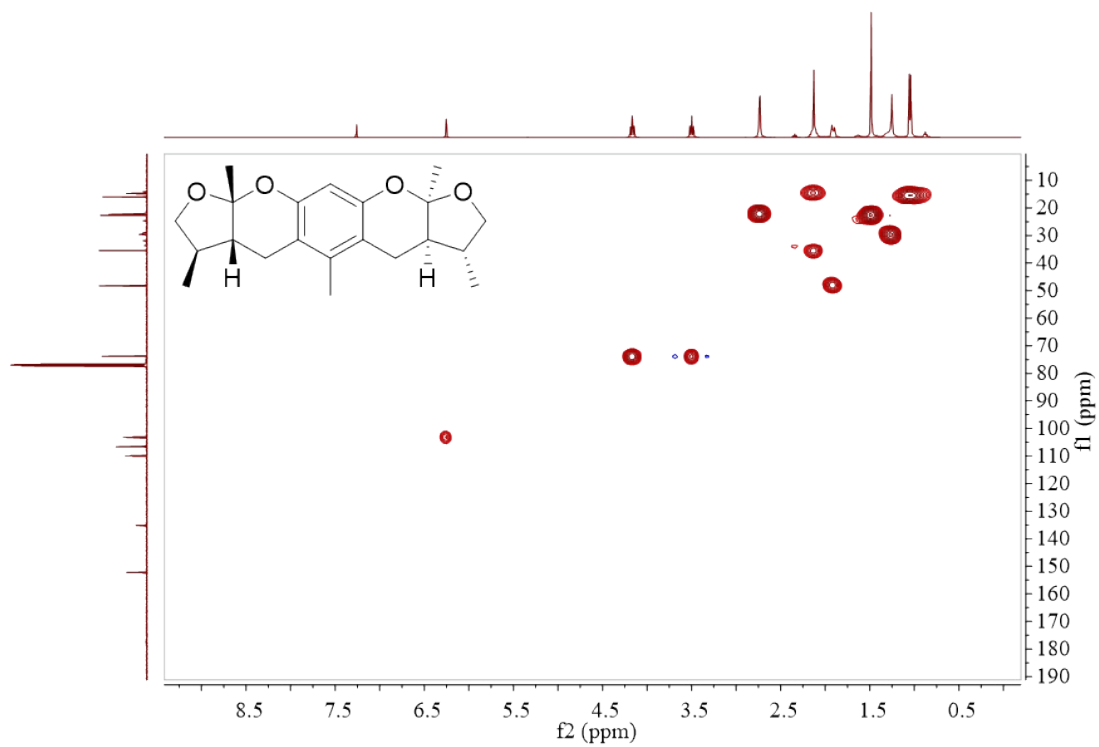

**Figure S14.** HSQC spectrum of **2** in  $\text{CDCl}_3$  at 400 MHz.

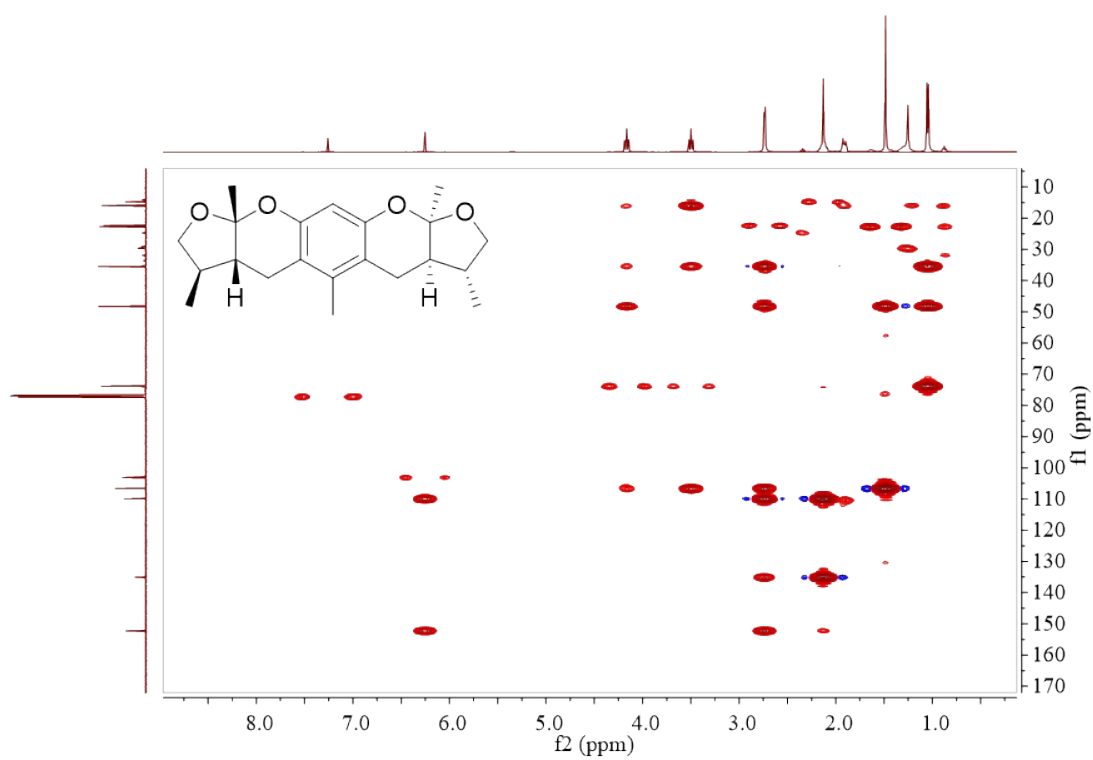

**Figure S15.** HMBC spectrum of **2** in  $\text{CDCl}_3$  at 400 MHz.

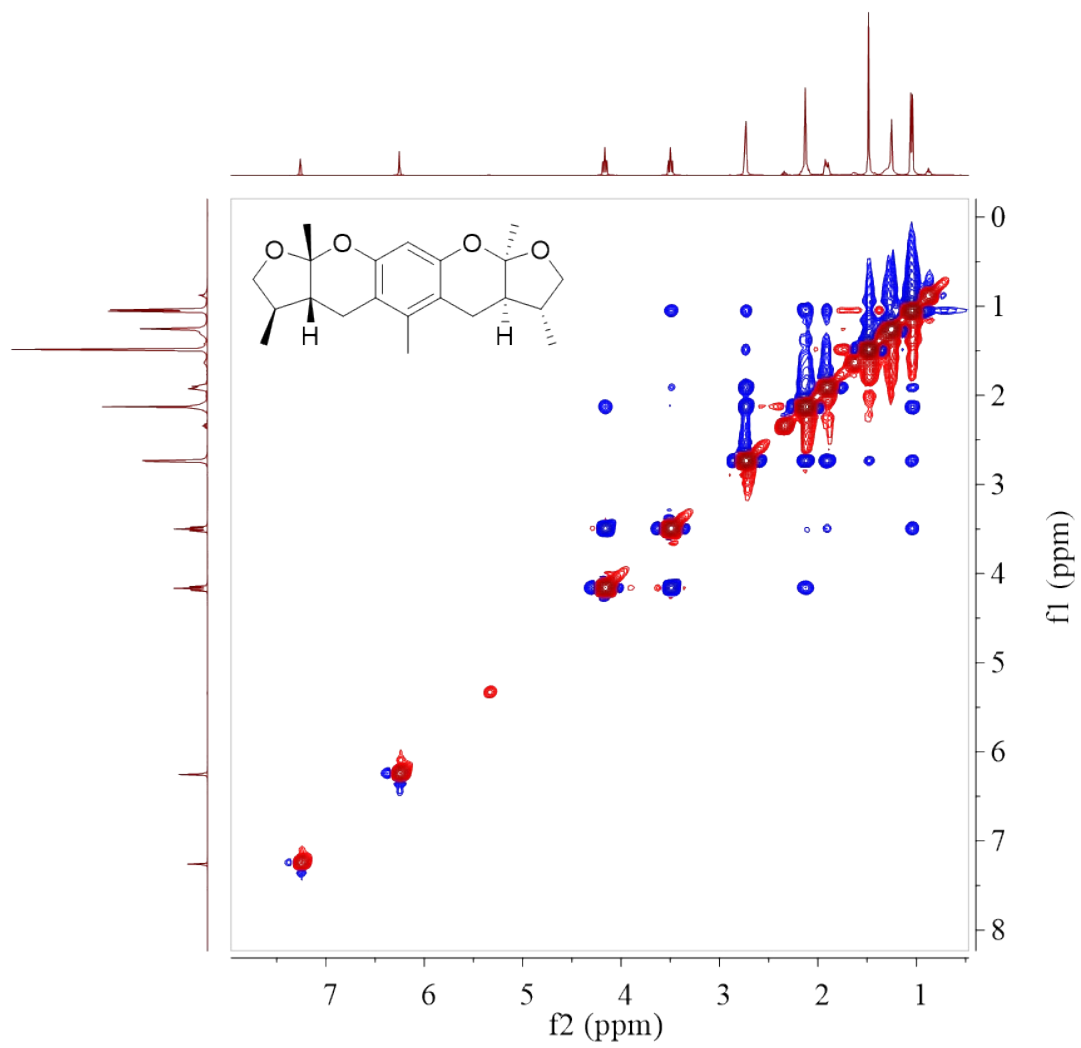

**Figure S16. NOESY spectrum of 2 in CDCl<sub>3</sub> at 400 MHz.**

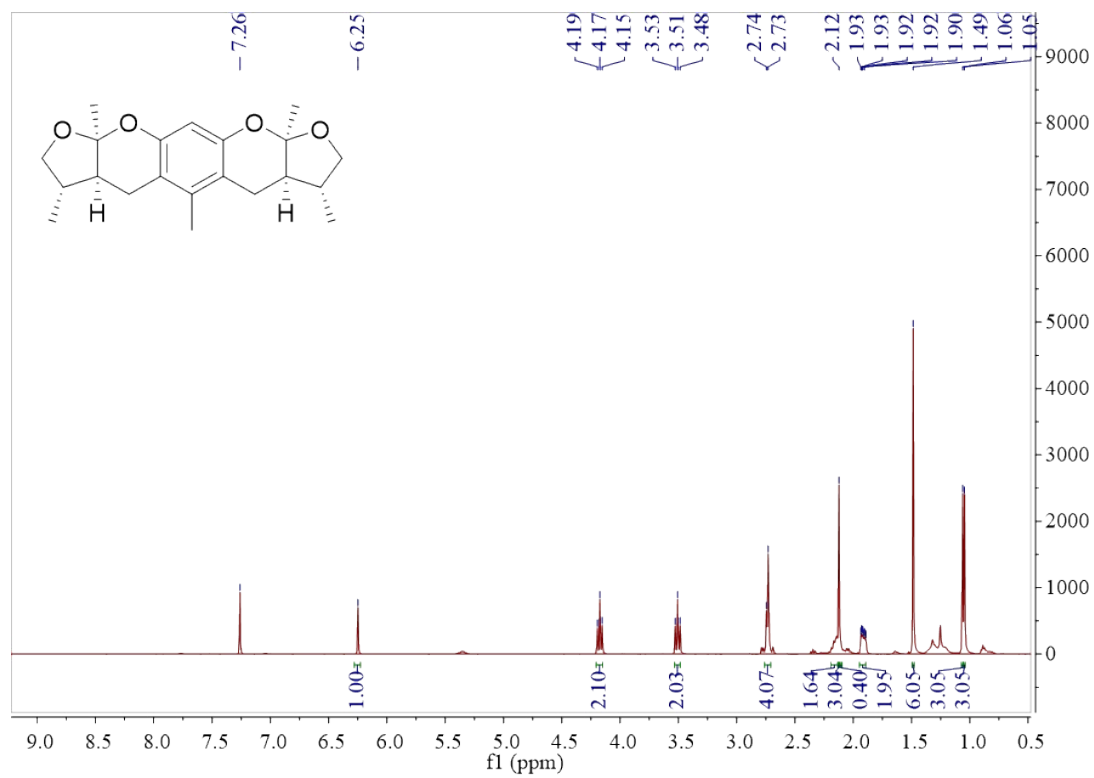

Figure S17.  $^1\text{H}$  NMR spectrum of 3 in  $\text{CDCl}_3$  at 400 MHz.

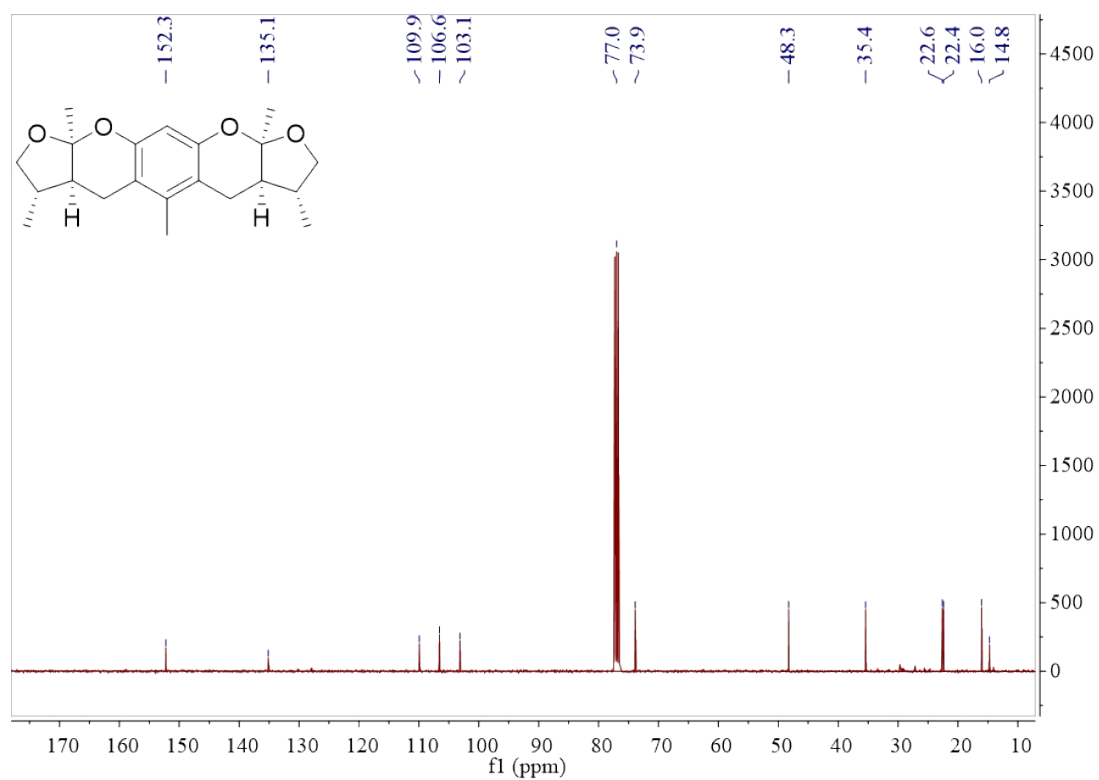

Figure S18.  $^{13}\text{C}$  NMR spectrum of 3 in  $\text{CDCl}_3$  at 100 MHz.

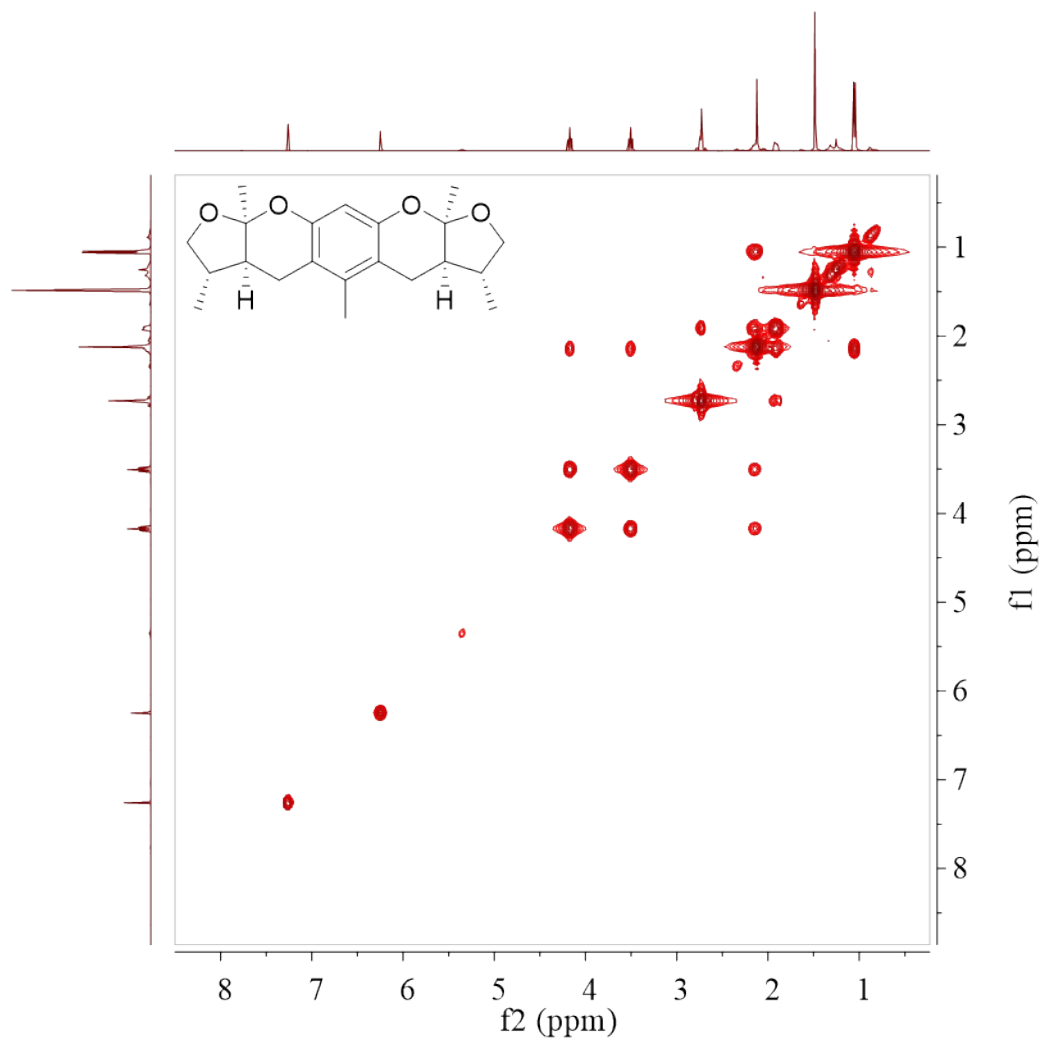

**Figure S19.**  $^1\text{H}$  - $^1\text{H}$  COSY spectrum of **3** in  $\text{CDCl}_3$  at 400 MHz.



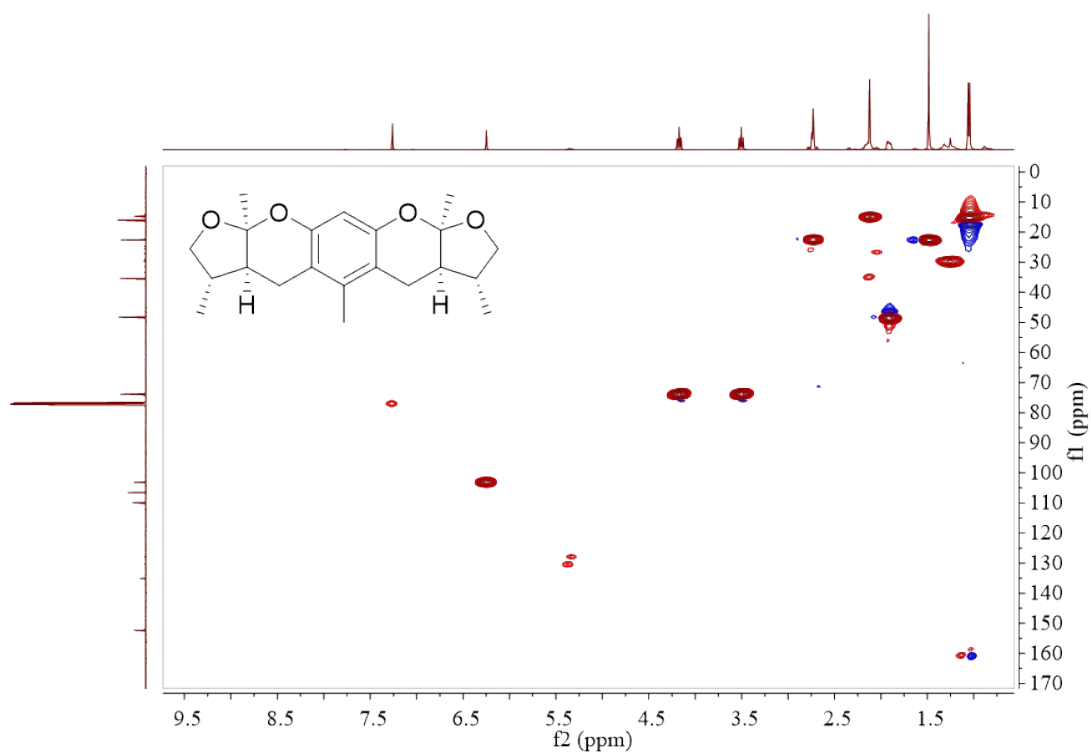

**Figure S20.** HSQC spectrum of **3** in  $\text{CDCl}_3$  at 600 MHz.

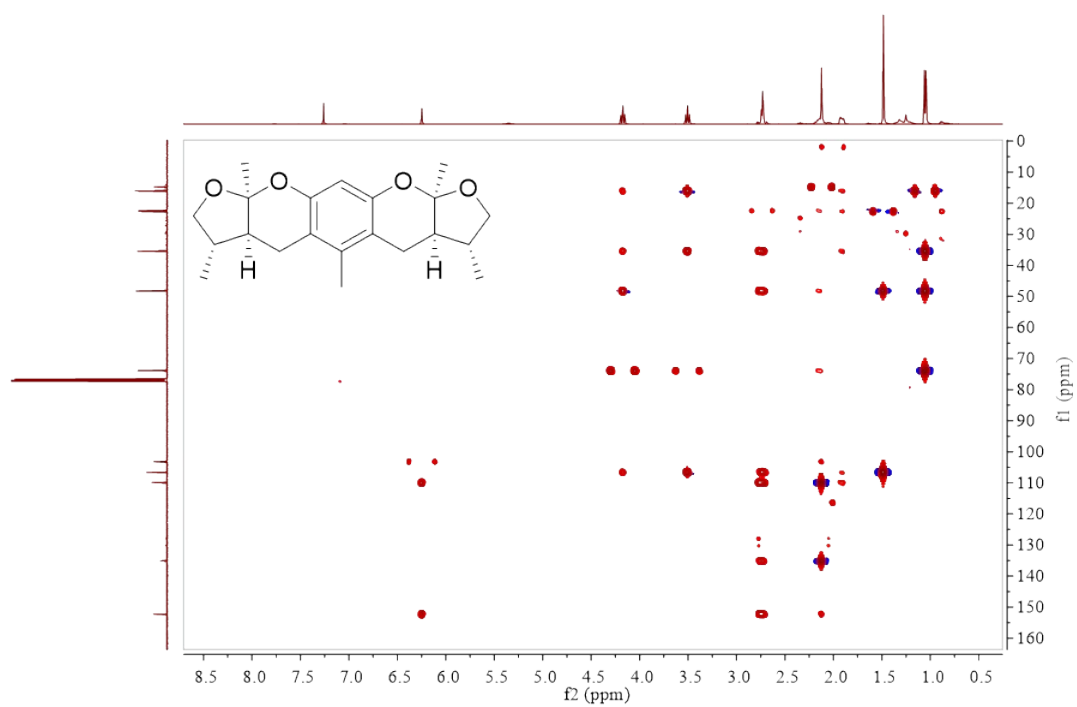

**Figure S21.** HMBC spectrum of **3** in  $\text{CDCl}_3$  at 600 MHz.

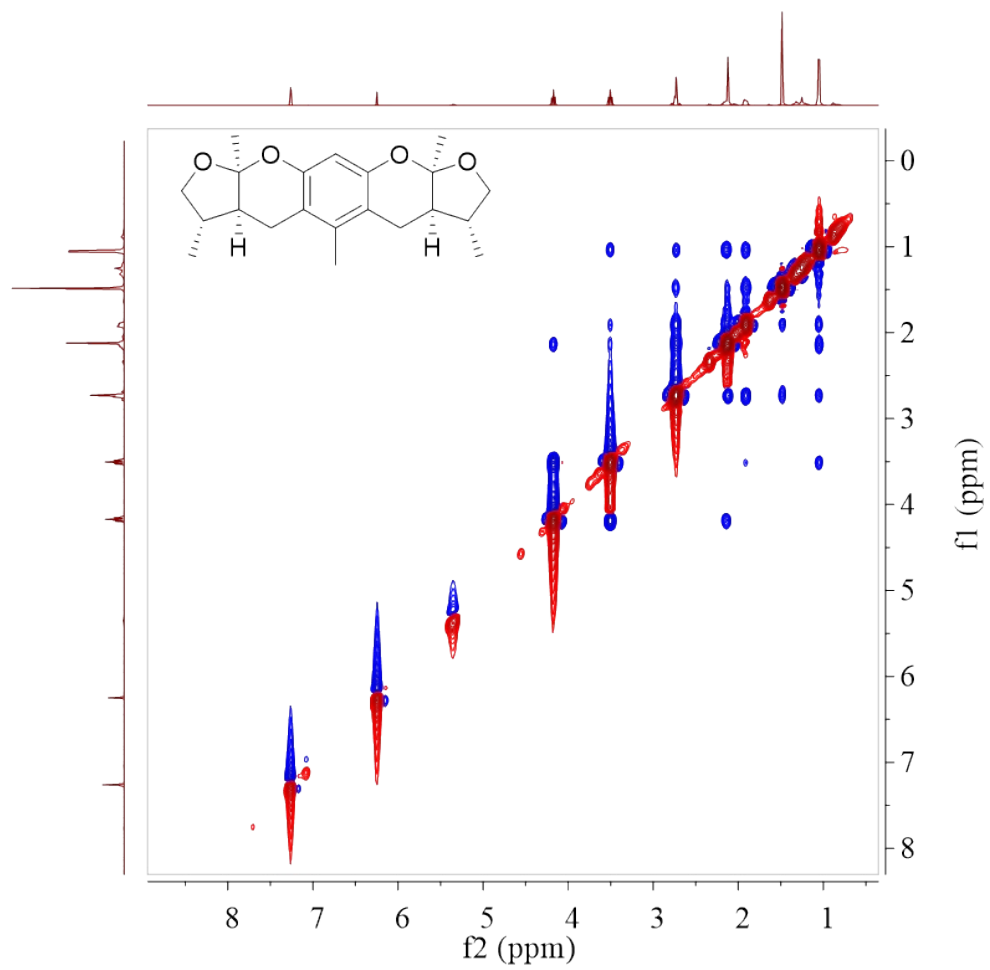

**Figure S22. NOESY spectrum of 3 in CDCl<sub>3</sub> at 600 MHz.**

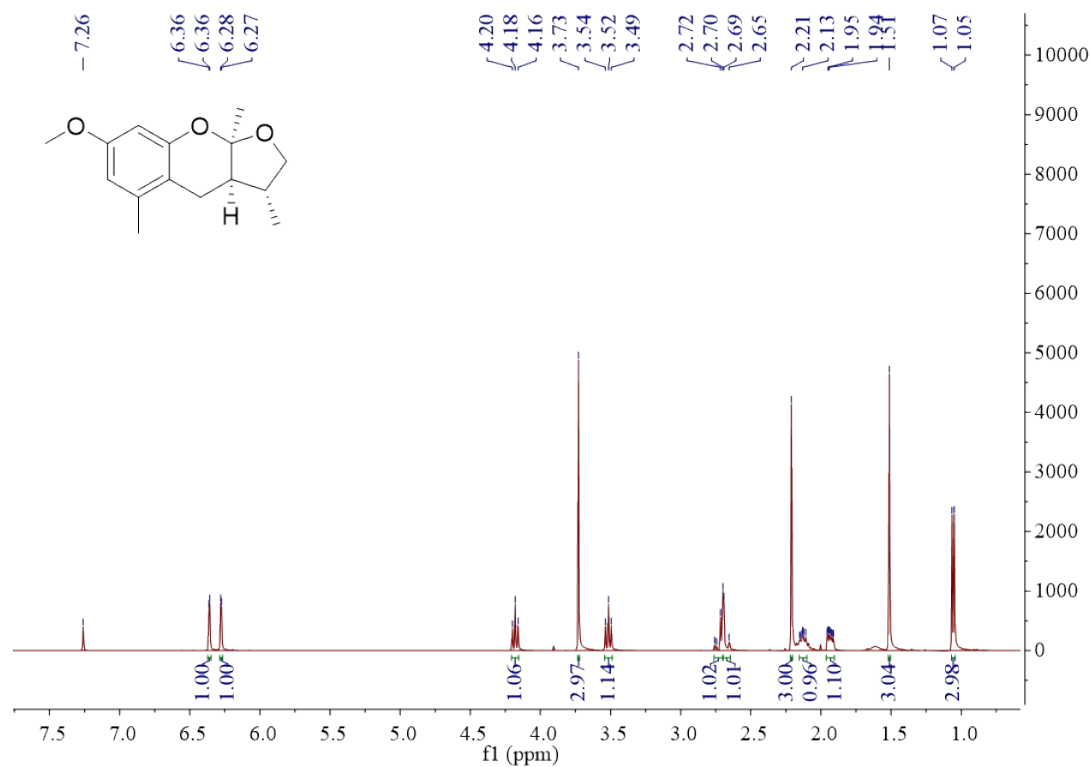

Figure S23.  $^1\text{H}$  NMR spectrum of 4 in  $\text{CDCl}_3$  at 400 MHz.

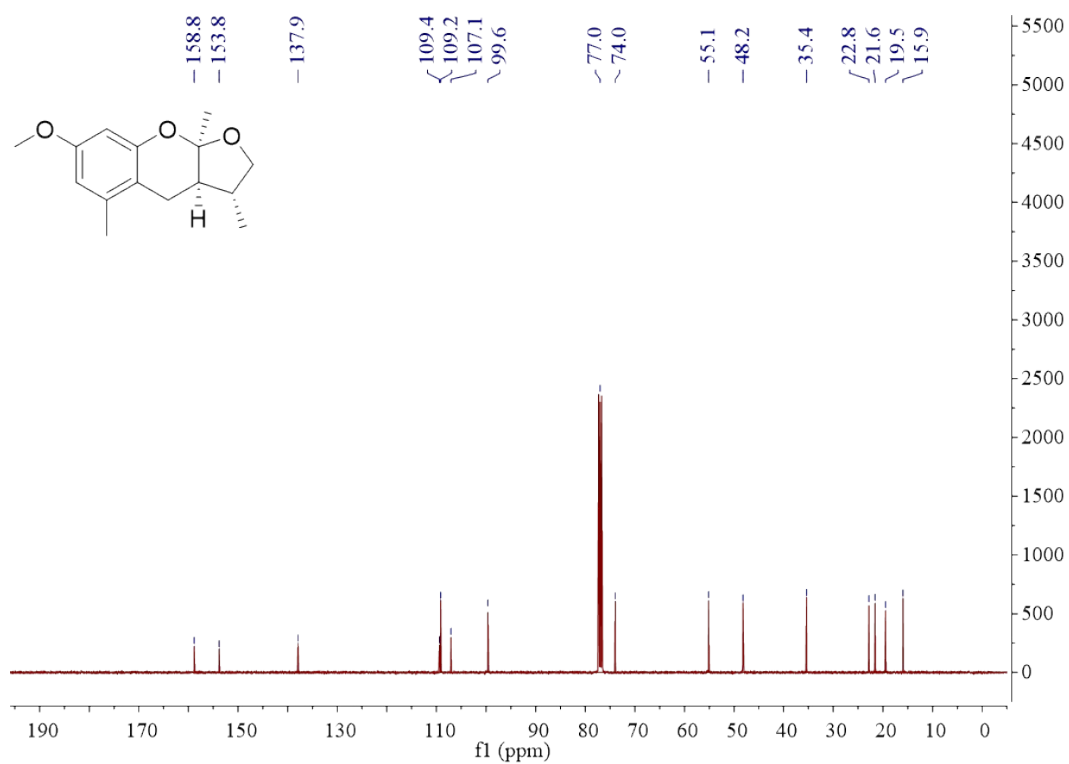

Figure S24.  $^{13}\text{C}$  NMR spectrum of 4 in  $\text{CDCl}_3$  at 100 MHz.

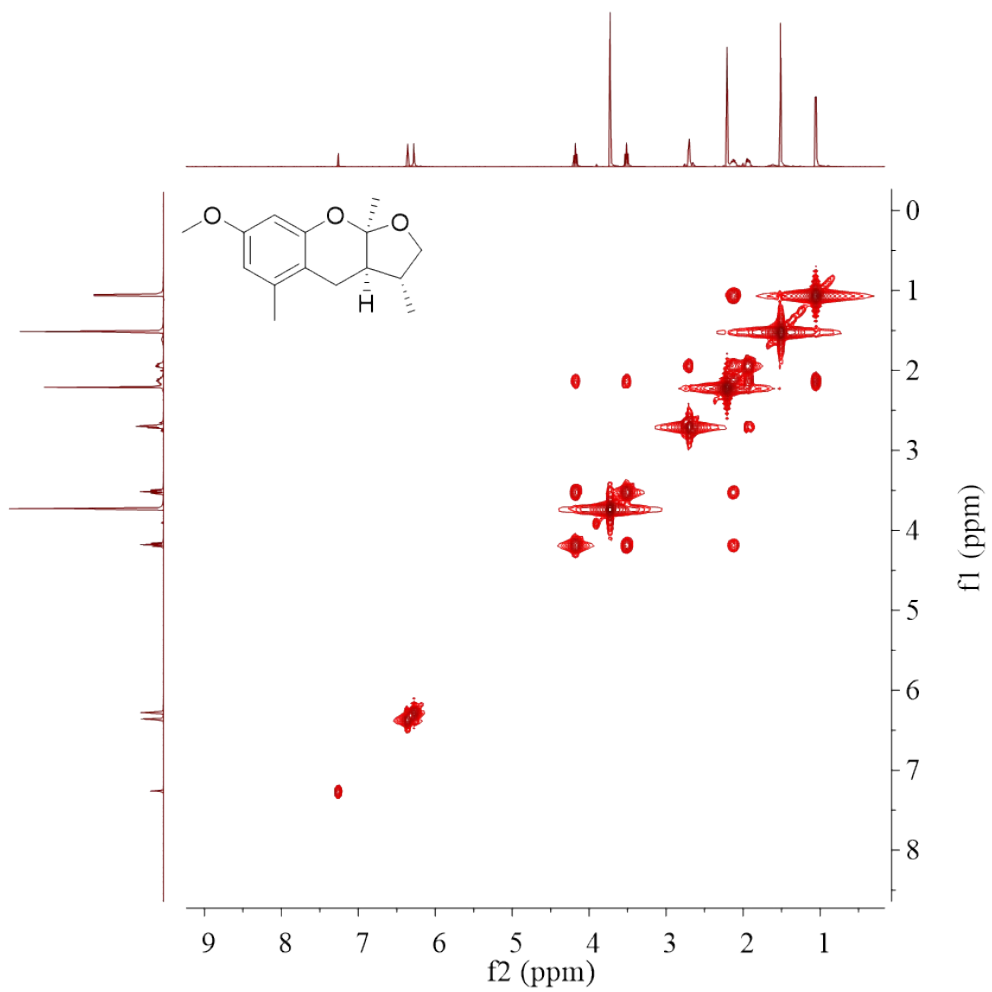

Figure S25.  $^1\text{H}$ - $^1\text{H}$  COSY spectrum of 4 in  $\text{CDCl}_3$  at 400 MHz.

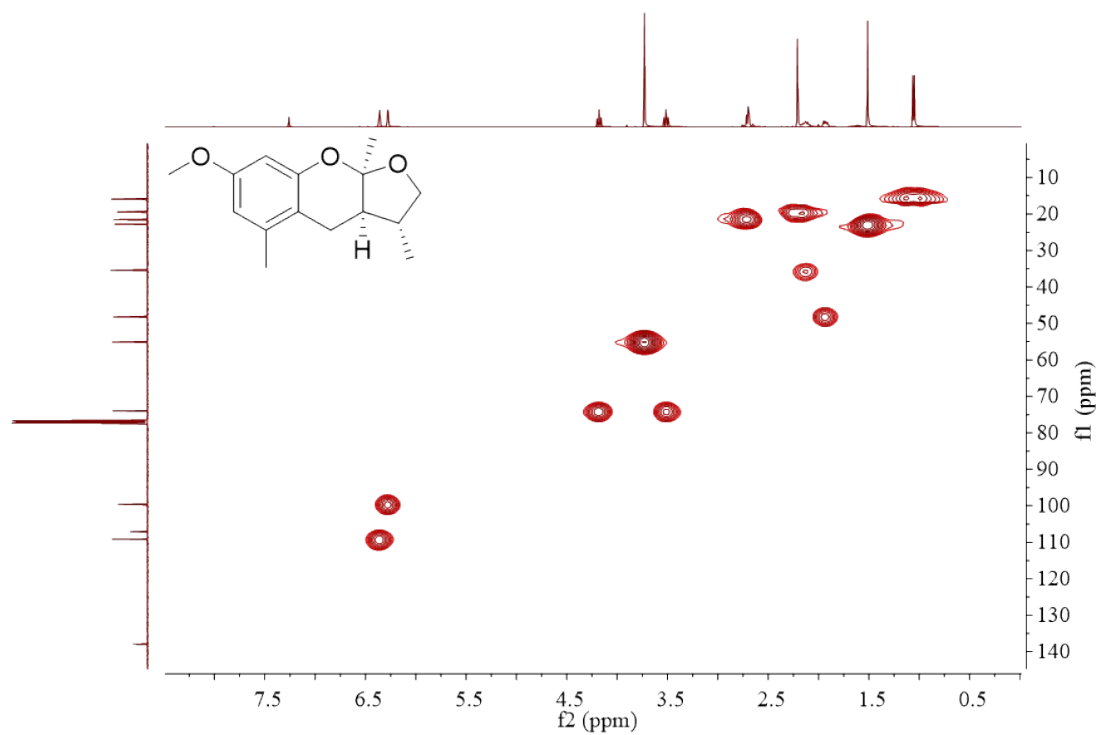

Figure S26. HSQC NMR spectrum of 4 in  $\text{CDCl}_3$  at 400 MHz.

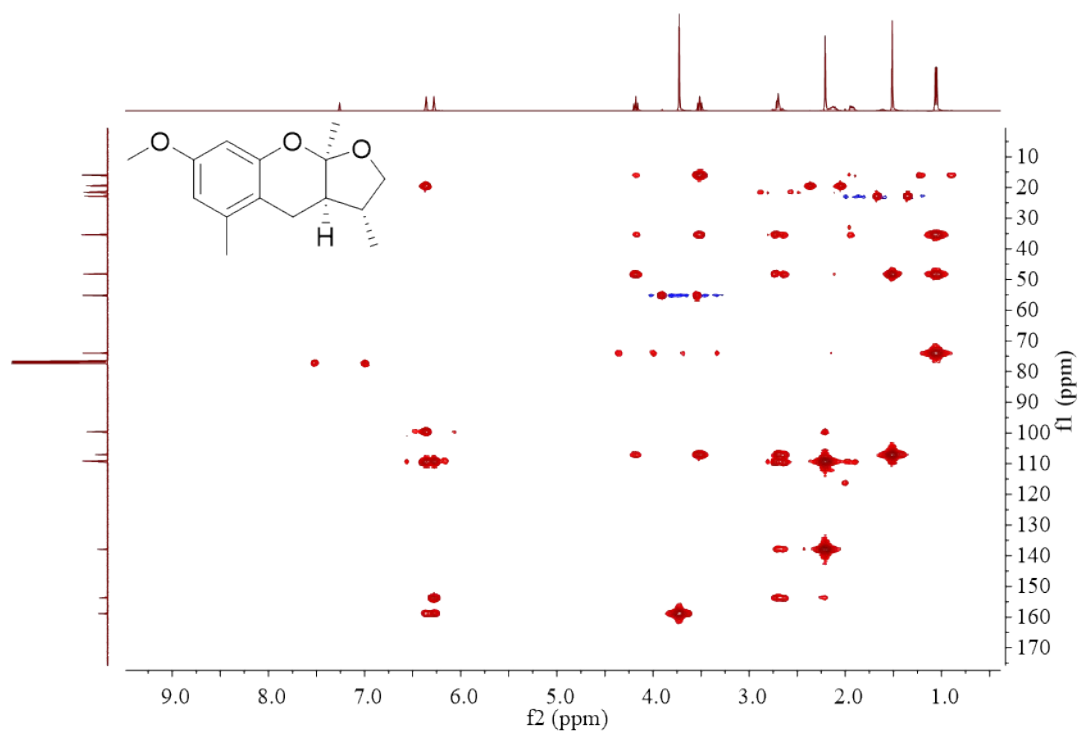

Figure S27. HMBC spectrum of 4 in  $\text{CDCl}_3$  at 400 MHz.

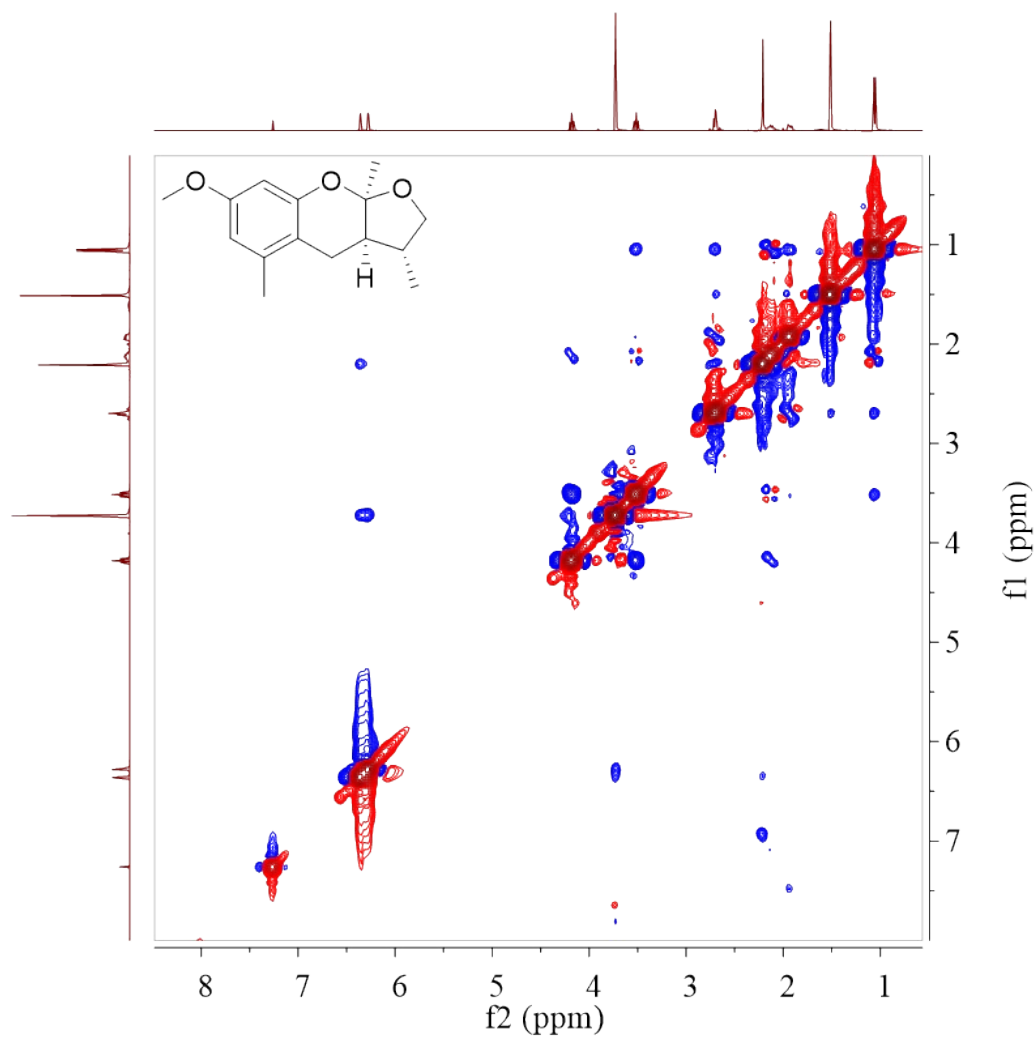

**Figure S28. ROESY spectrum of 4 in CDCl<sub>3</sub> at 400 MHz.**

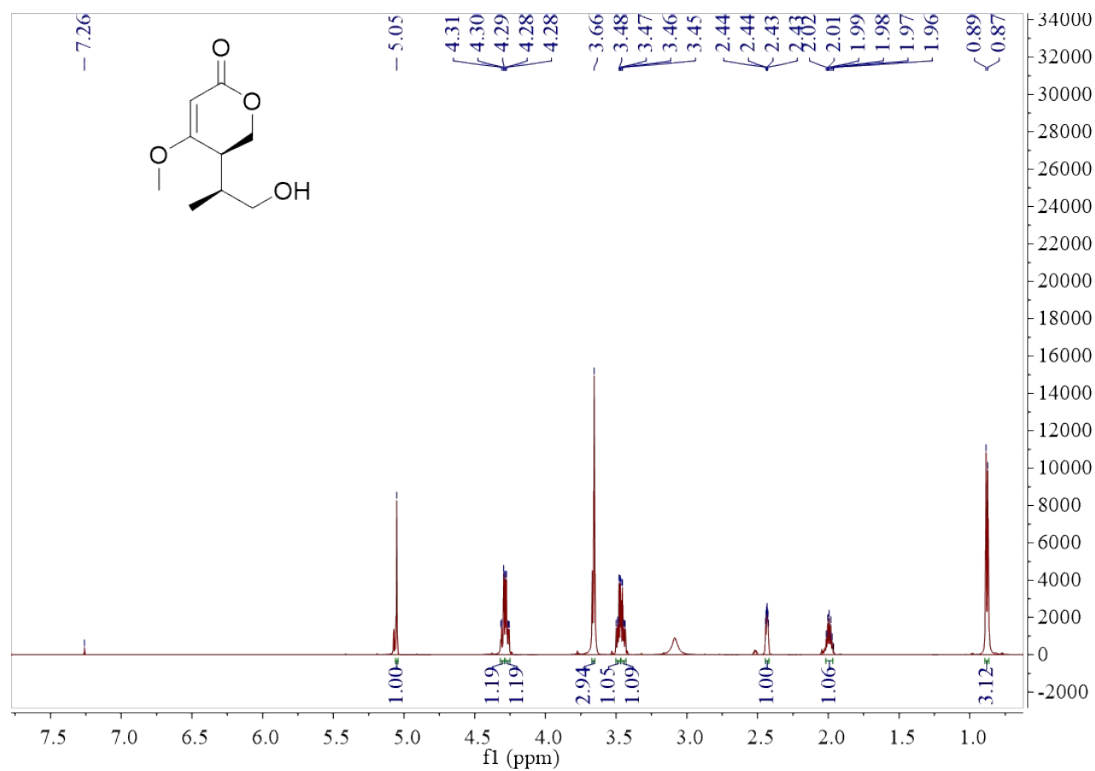

Figure S29.  $^1\text{H}$  NMR spectrum of 5 in  $\text{CDCl}_3$  at 600 MHz.

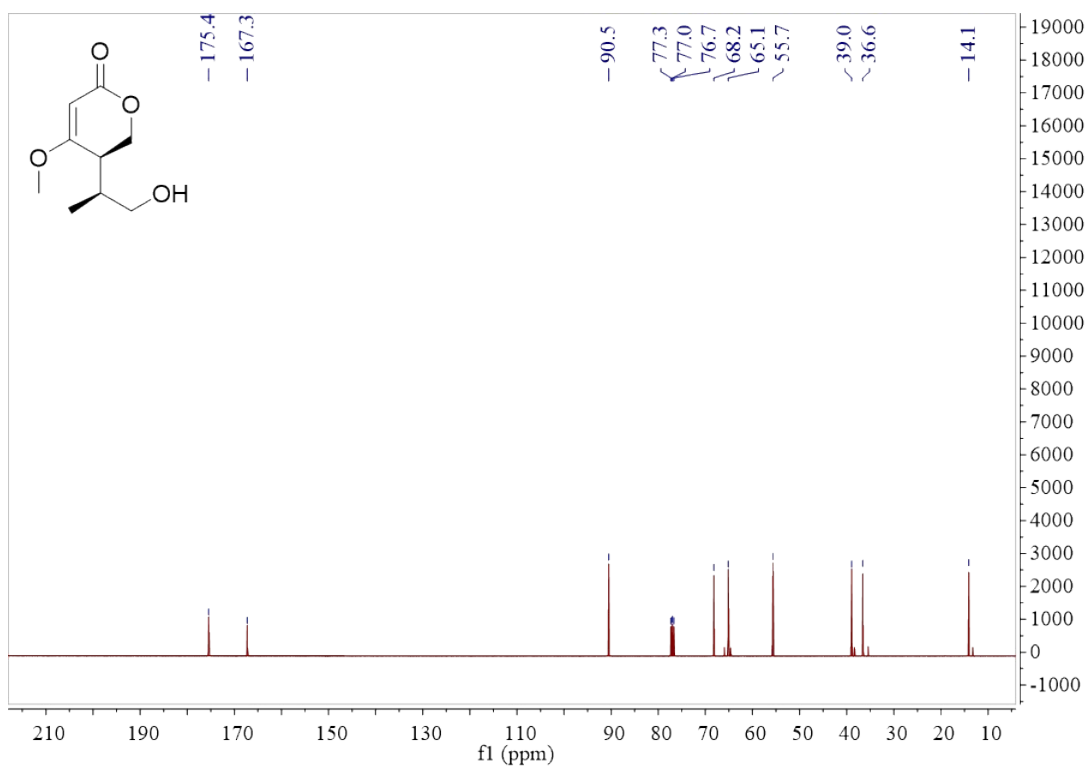

Figure S30.  $^{13}\text{C}$  NMR spectrum of 5 in  $\text{CDCl}_3$  at 100 MHz.

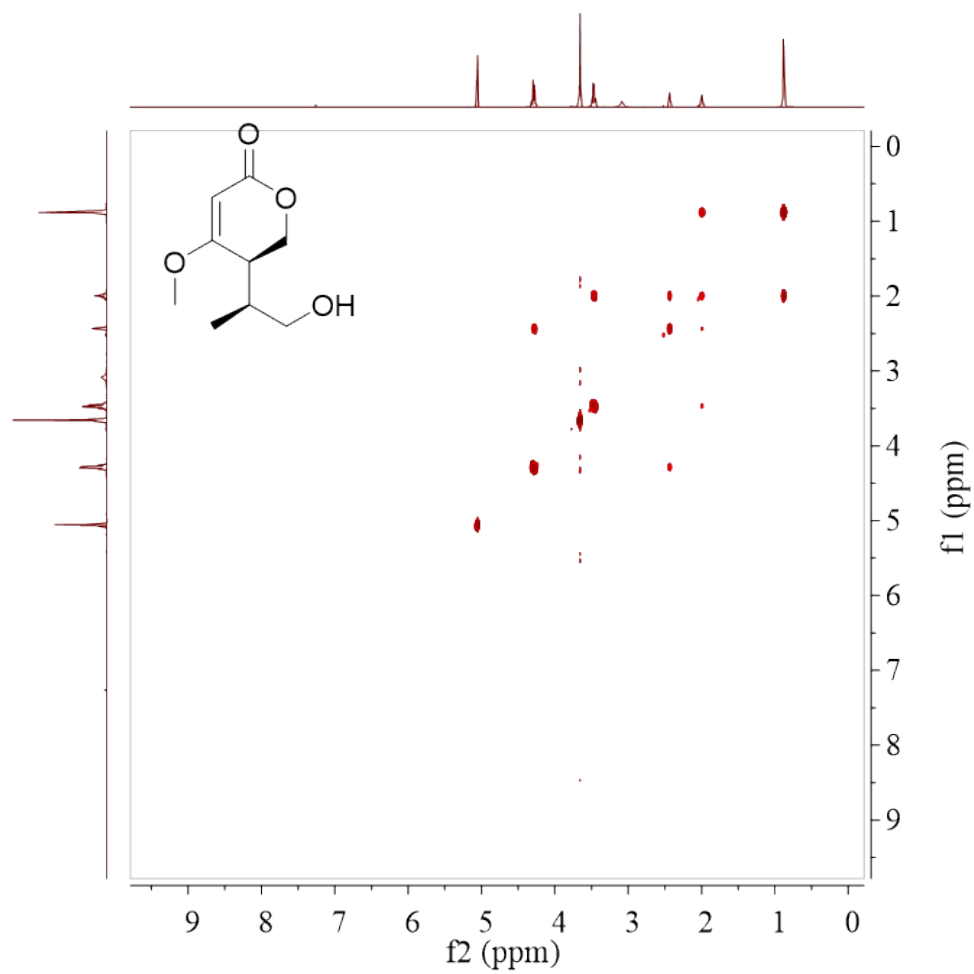

Figure S31.  $^1\text{H}$ - $^1\text{H}$  COSY spectrum of 5 in  $\text{CDCl}_3$  at 600 MHz.



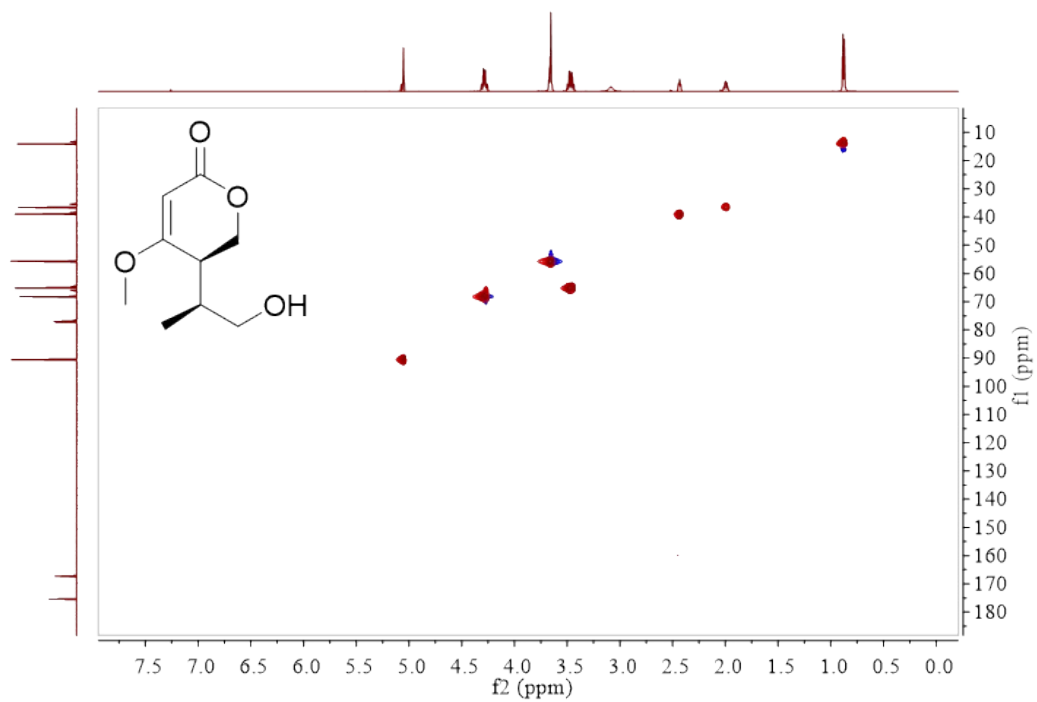

Figure S32. HSQC spectrum of 5 in  $\text{CDCl}_3$  at 600 MHz.

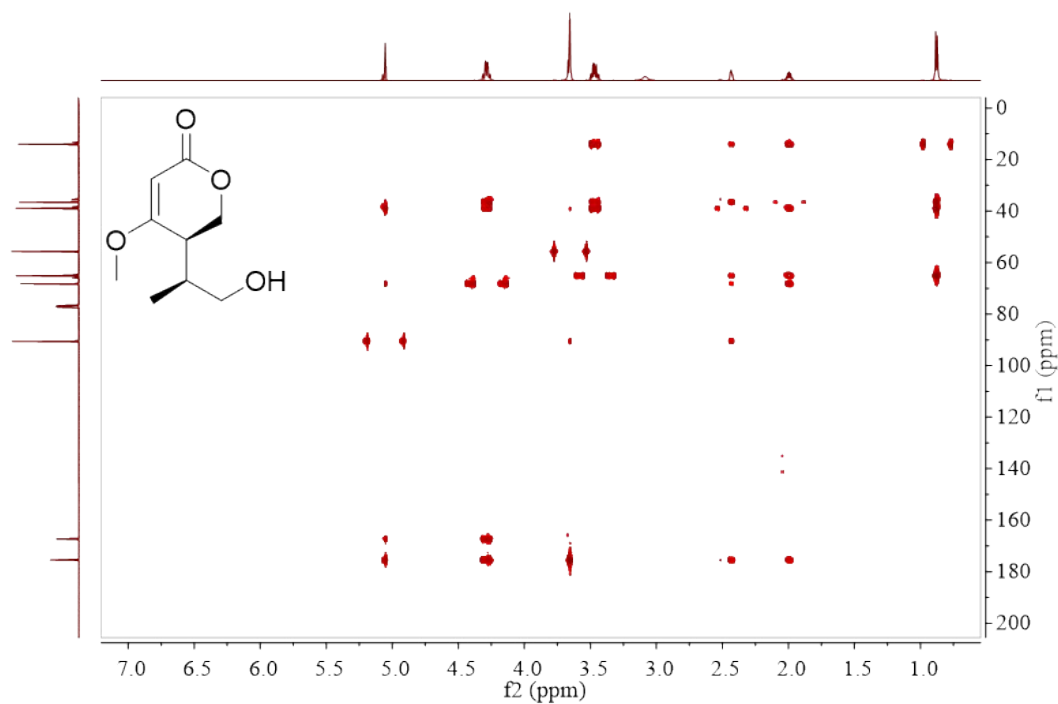

Figure S33. HMBC spectrum of 5 in  $\text{CDCl}_3$  at 600 MHz.

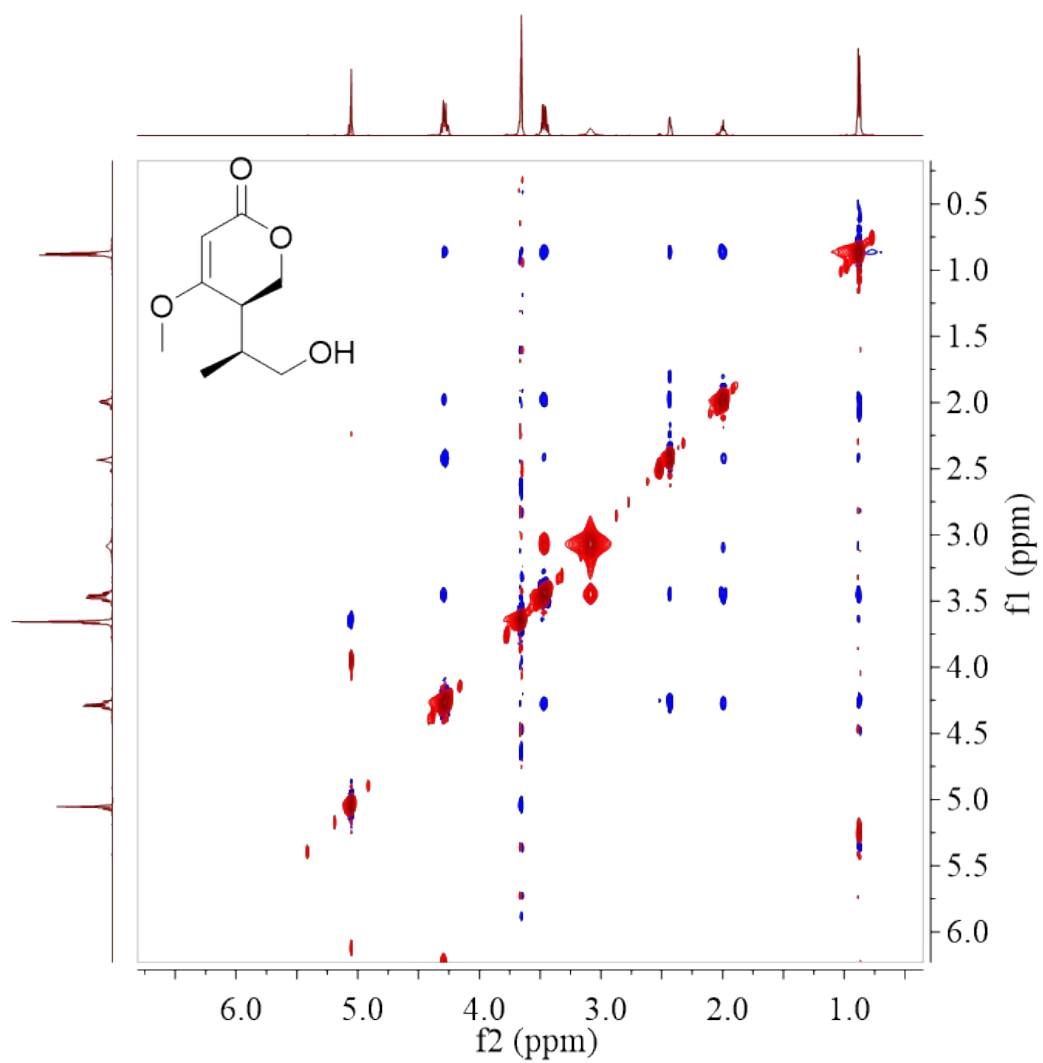

**Figure S34. NOESY spectrum of 5 in CDCl<sub>3</sub> at 600 MHz.**

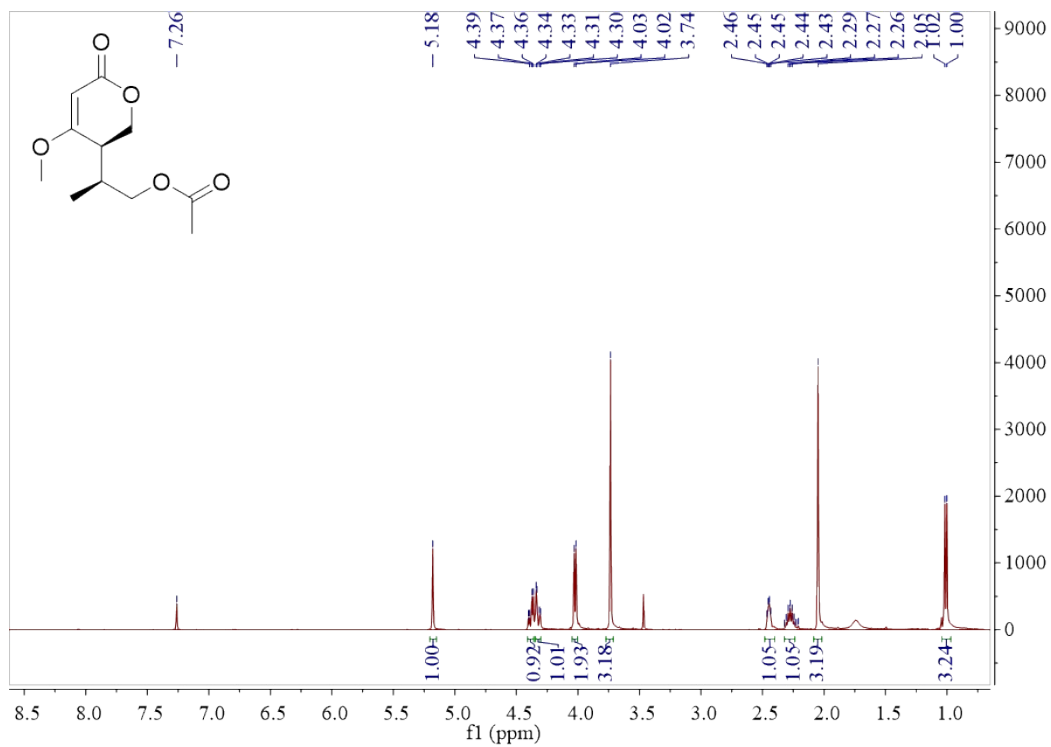

Figure S35.  $^1\text{H}$  NMR spectrum of 6 in  $\text{CDCl}_3$  at 400 MHz.

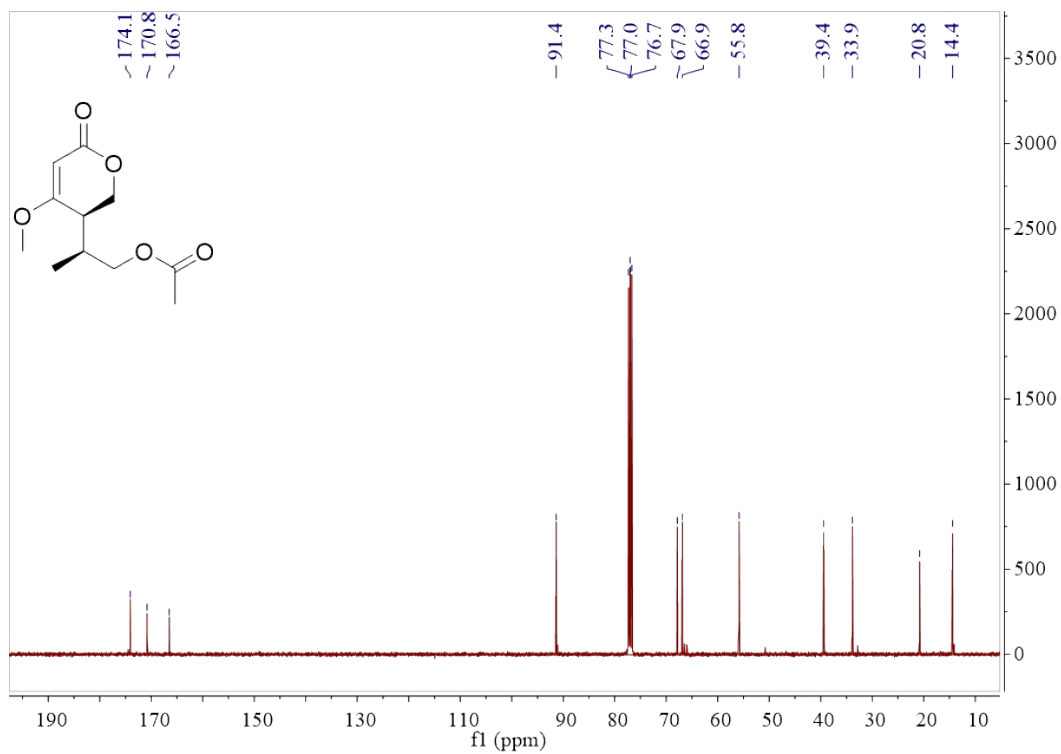

Figure S36.  $^{13}\text{C}$  NMR spectrum of 6 in  $\text{CDCl}_3$  at 100 MHz.

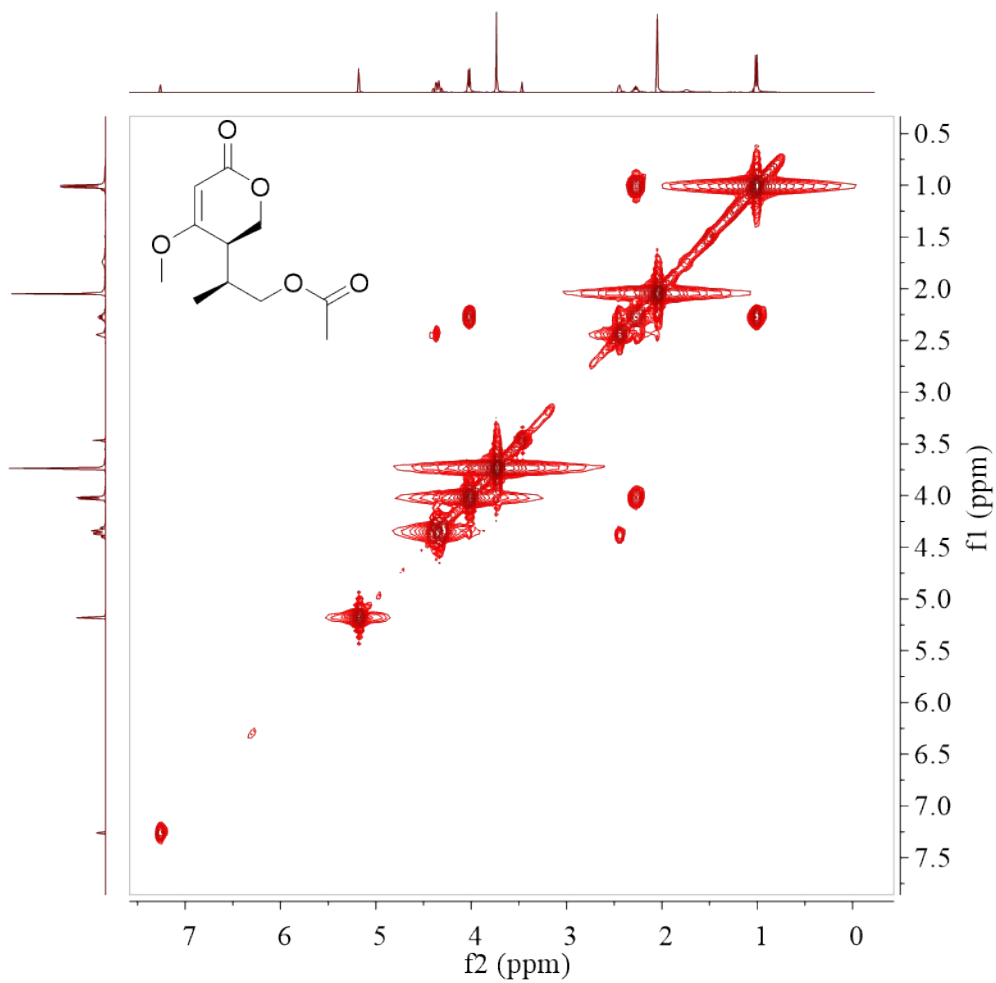

Figure S37.  $^1\text{H}$ - $^1\text{H}$  COSY spectrum of 6 in  $\text{CDCl}_3$  at 400 MHz.

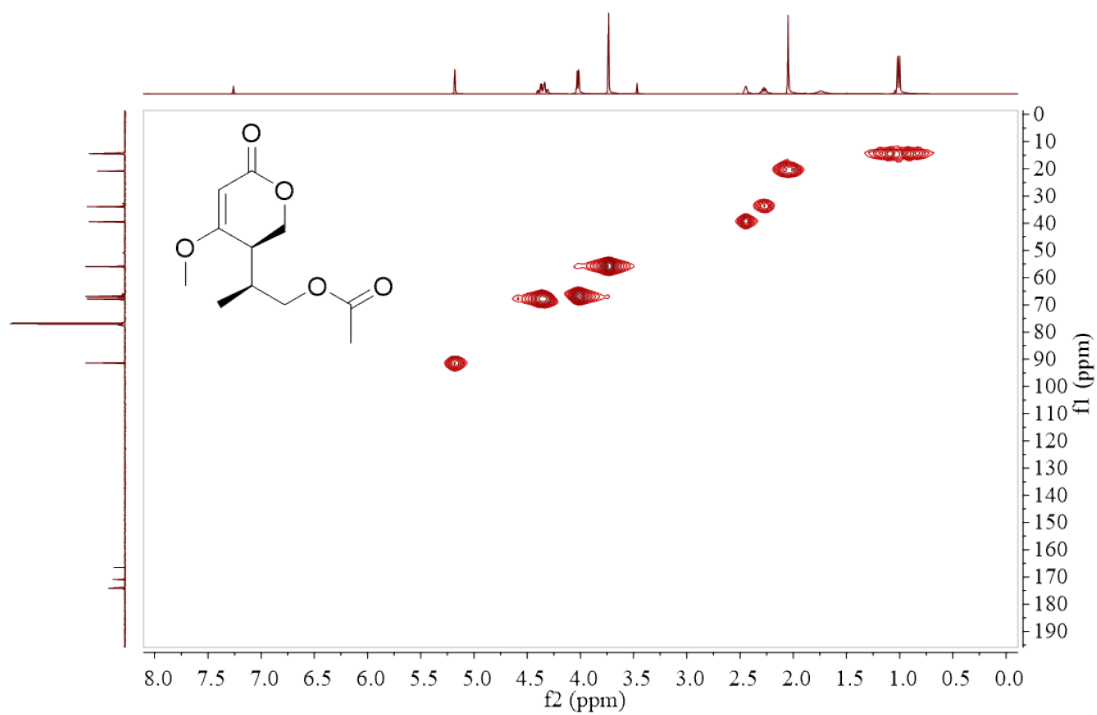

**Figure S38.** HSQC spectrum of 6 in  $\text{CDCl}_3$  at 400 MHz.

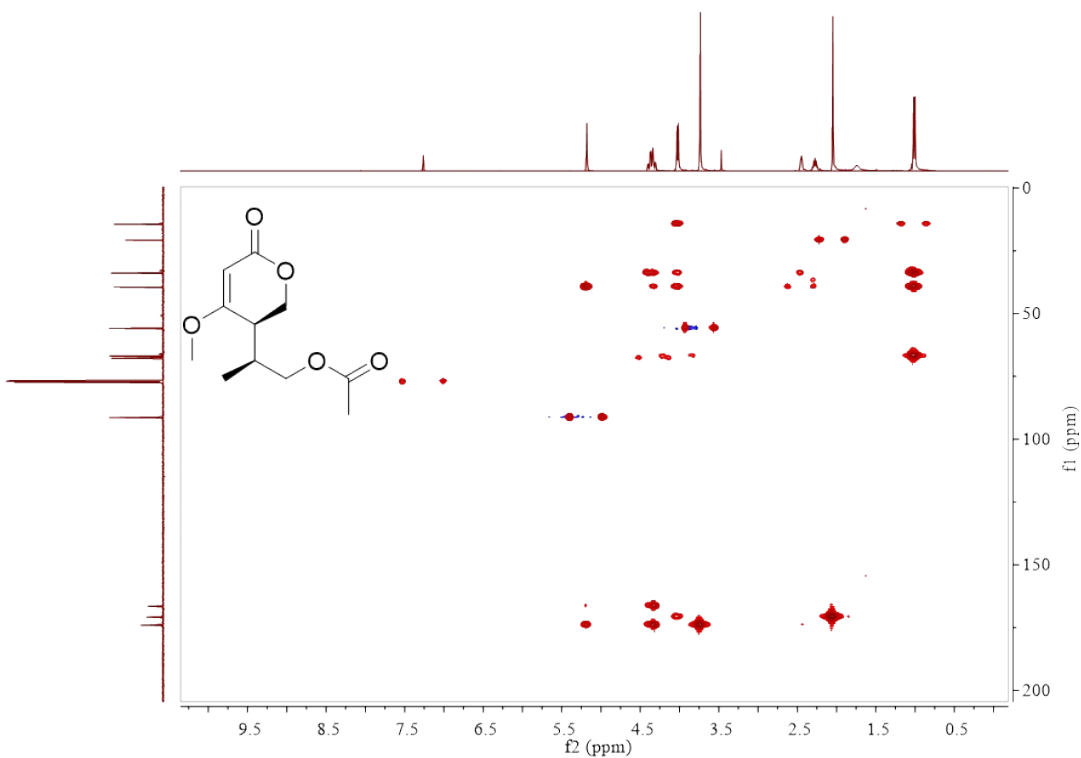

**Figure S39.** HMBC spectrum of 6 in  $\text{CDCl}_3$  at 400 MHz.



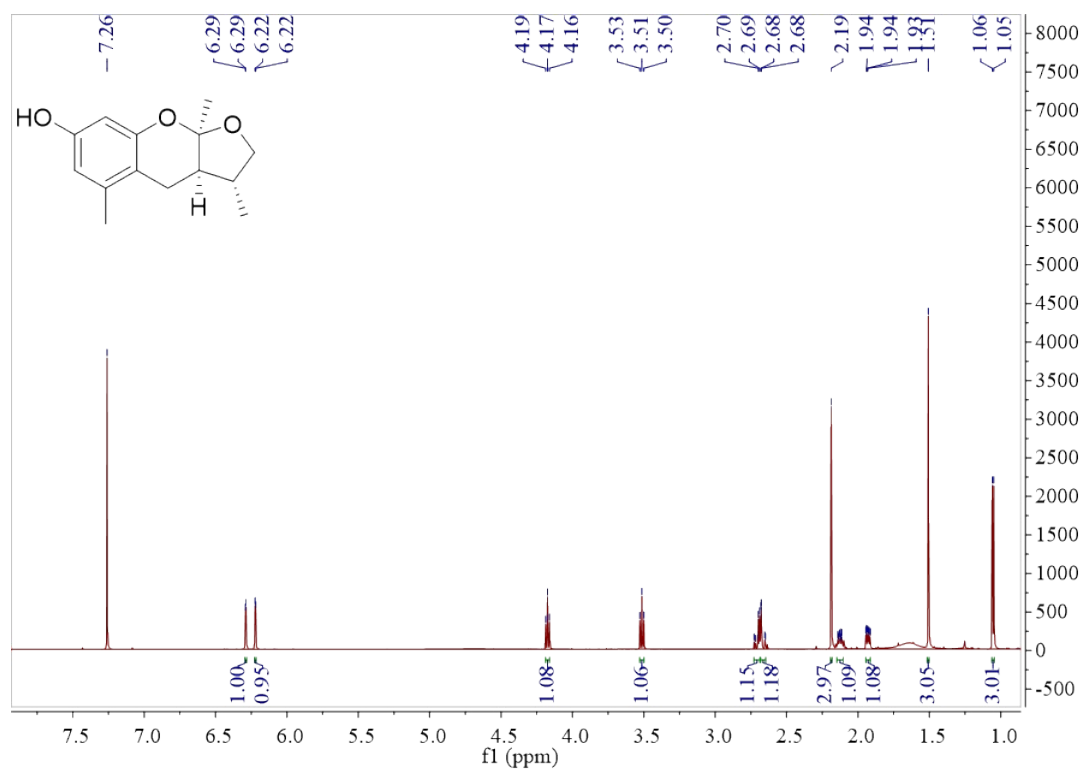

Figure S41.  $^1\text{H}$  NMR spectrum of 7 in  $\text{CDCl}_3$  at 600 MHz.

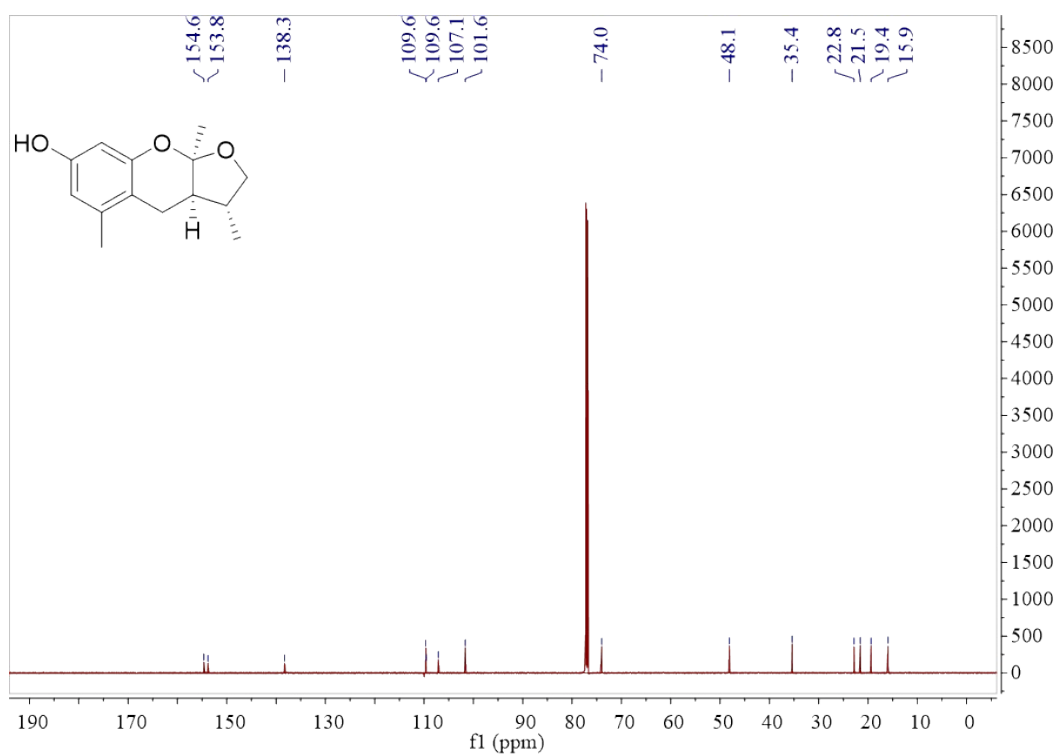

Figure S42.  $^{13}\text{C}$  NMR spectrum of 7 in  $\text{CDCl}_3$  at 150 MHz.

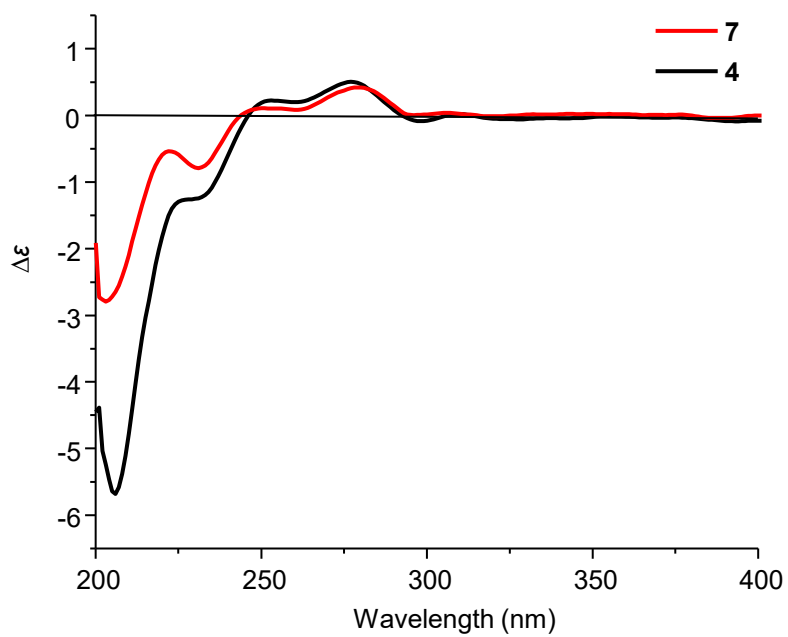

**Figure S43. ECD spectra of 4 and 7.**



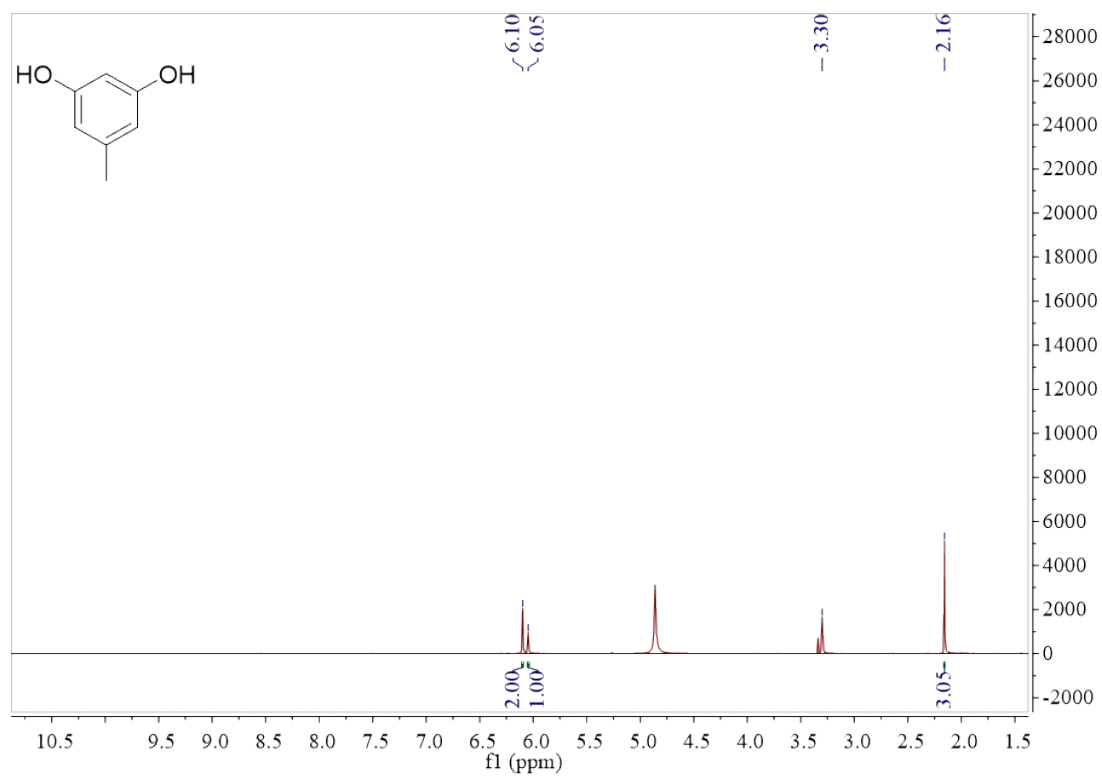

Figure S44.  $^1\text{H}$  NMR spectrum of 8 in  $\text{CD}_3\text{OD}$  at 400 MHz.

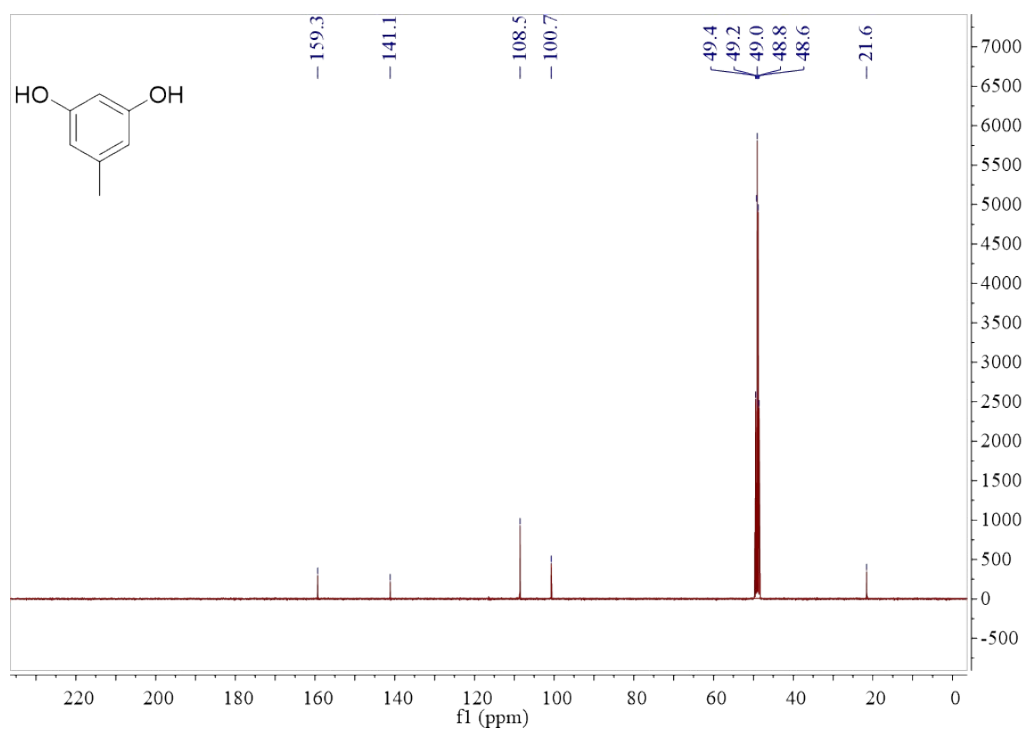

Figure S45.  $^{13}\text{C}$  NMR spectrum of 8 in  $\text{CD}_3\text{OD}$  at 100 MHz.

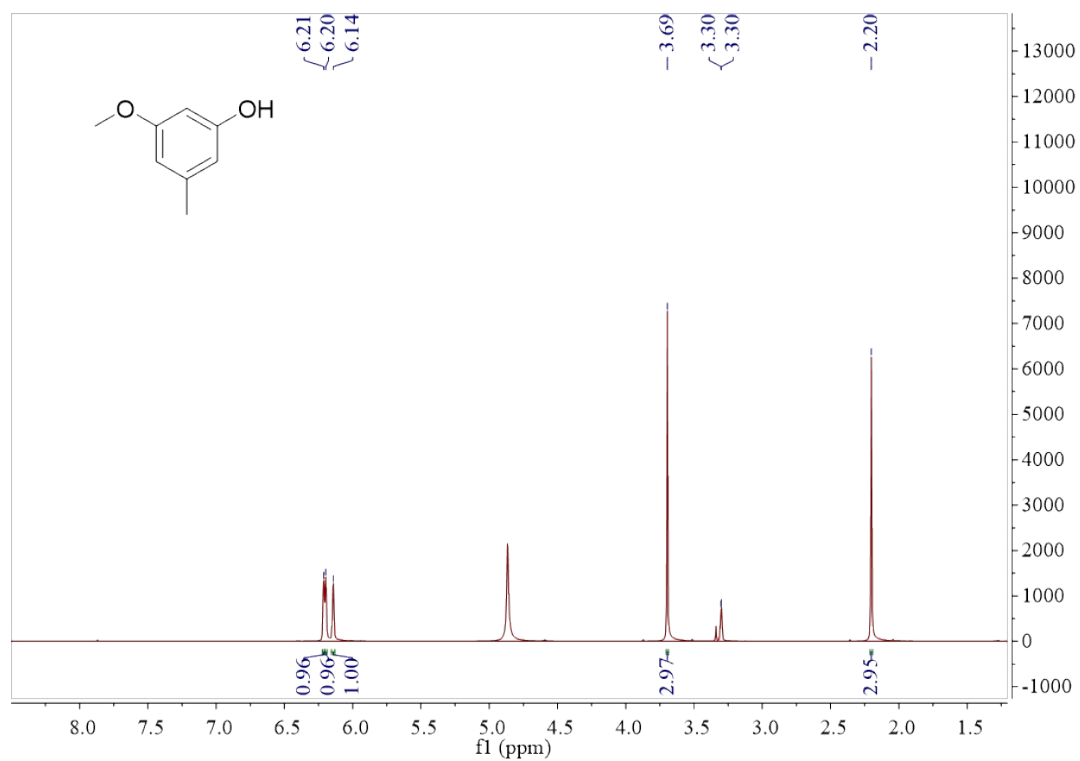

Figure S46.  $^1\text{H}$  NMR spectrum of 9 in  $\text{CD}_3\text{OD}$  at 400 MHz.

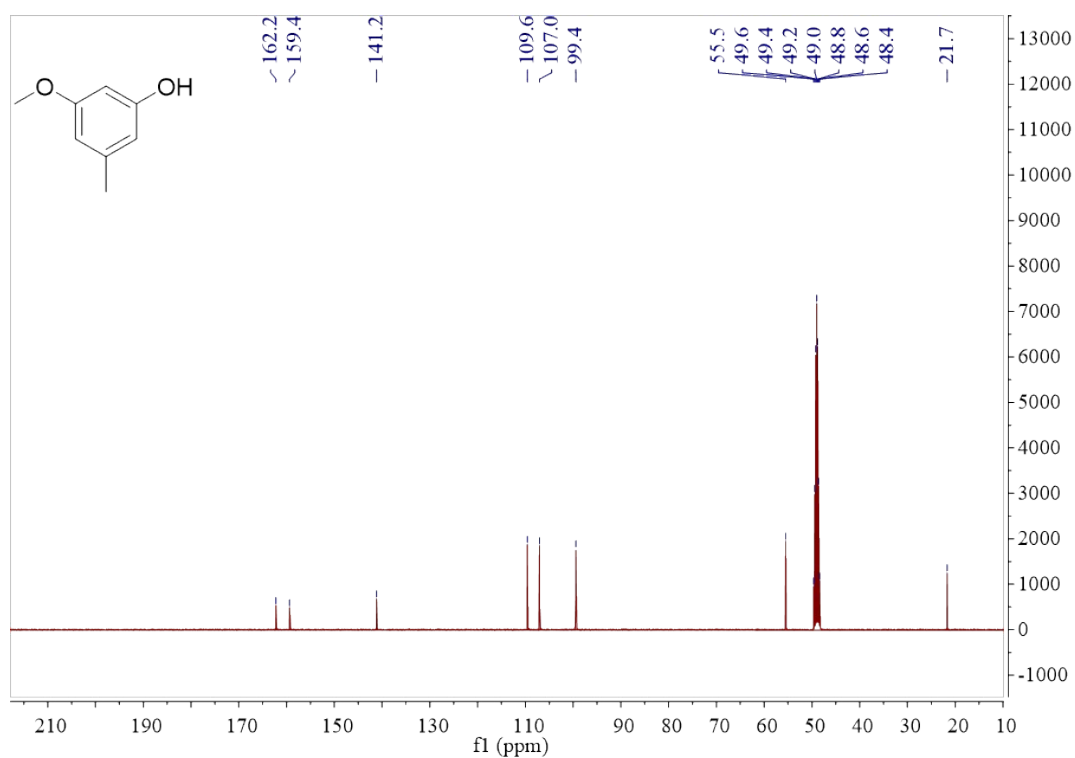

Figure S47.  $^{13}\text{C}$  NMR spectrum of 9 in  $\text{CD}_3\text{OD}$  at 100 MHz.

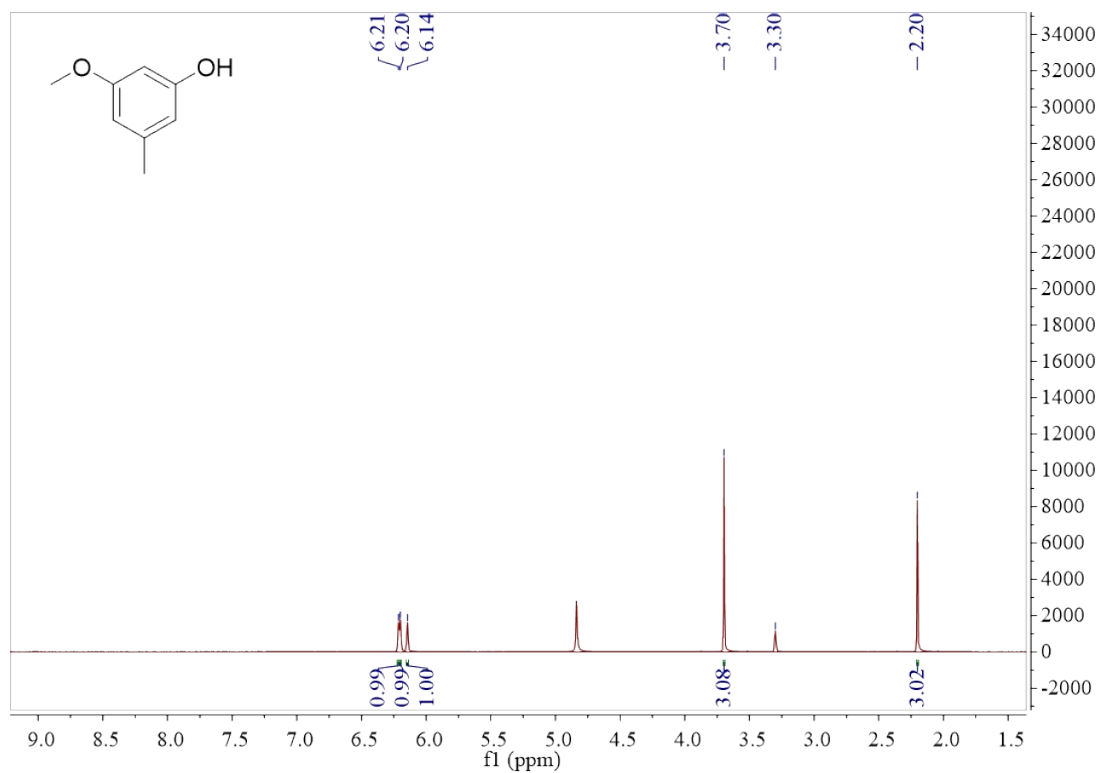

Figure S48.  $^1\text{H}$  NMR spectrum of authentic *O*-methylorcinol in  $\text{CD}_3\text{OD}$  at 400 MHz.

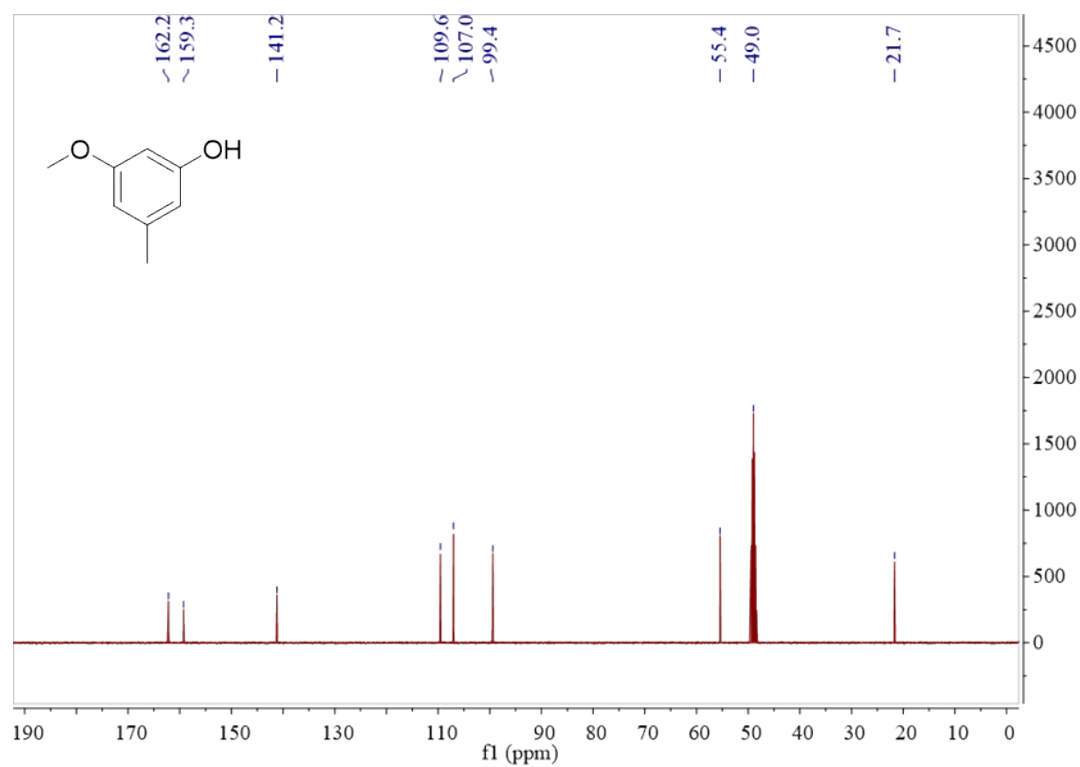

Figure S49.  $^{13}\text{C}$  NMR spectrum of authentic *O*-methylorcinol in  $\text{CD}_3\text{OD}$  at 400 MHz.

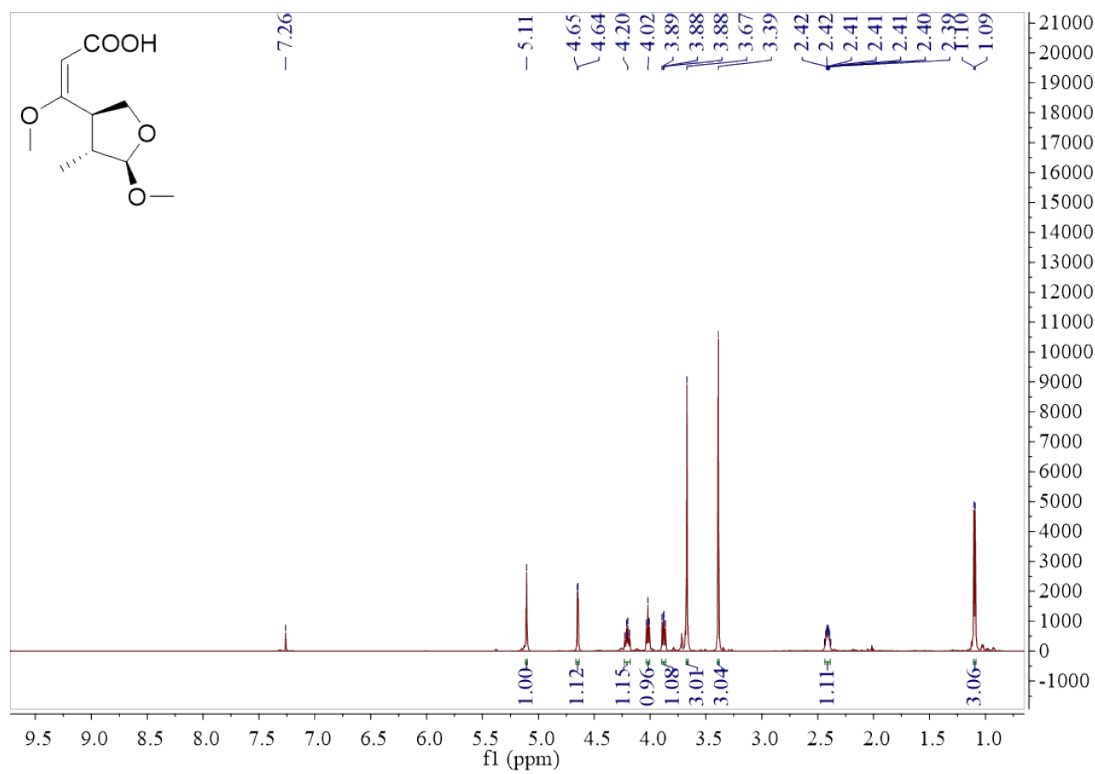

Figure S50.  $^1\text{H}$  NMR spectrum of 10 in  $\text{CDCl}_3$  at 400 MHz.

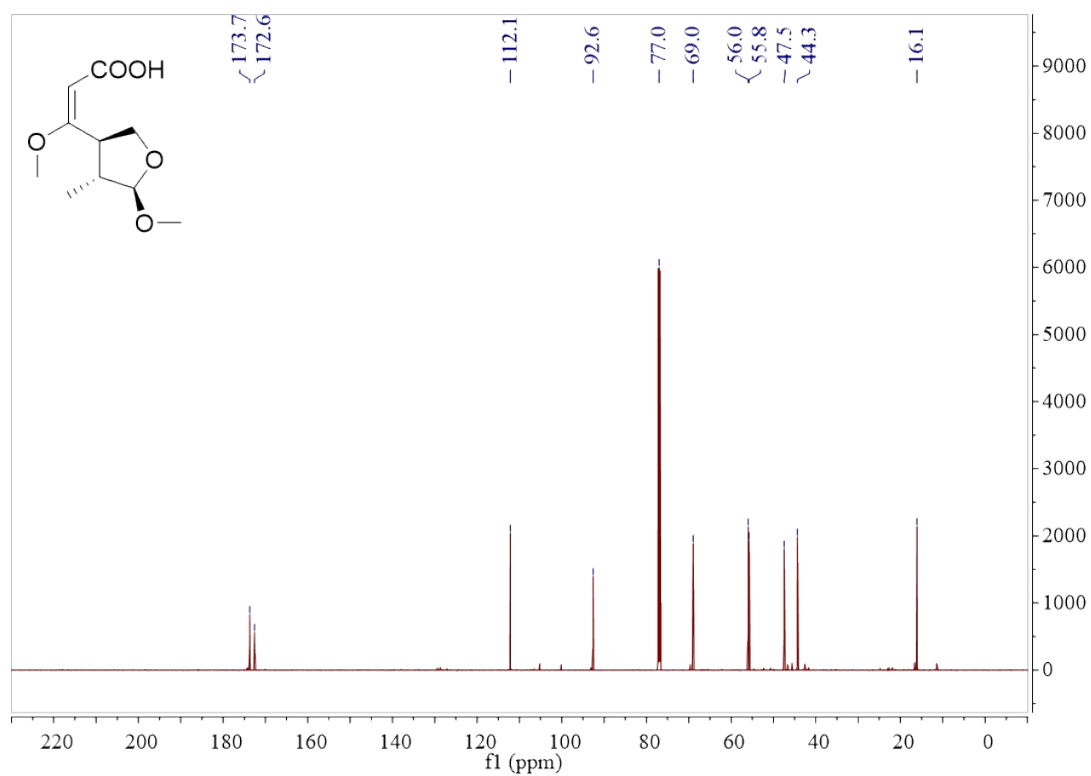

Figure S51.  $^{13}\text{C}$  NMR spectrum of 10 in  $\text{CDCl}_3$  at 100 MHz.

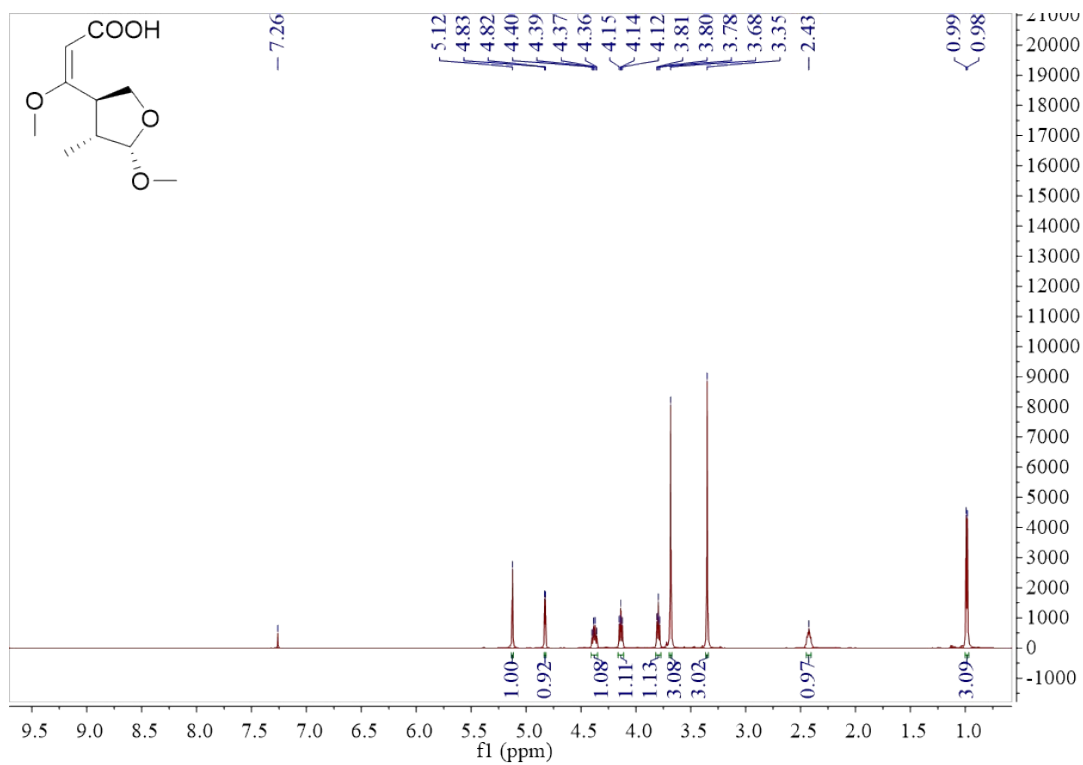

Figure S52.  $^1\text{H}$  NMR spectrum of 11 in  $\text{CDCl}_3$  at 600 MHz.

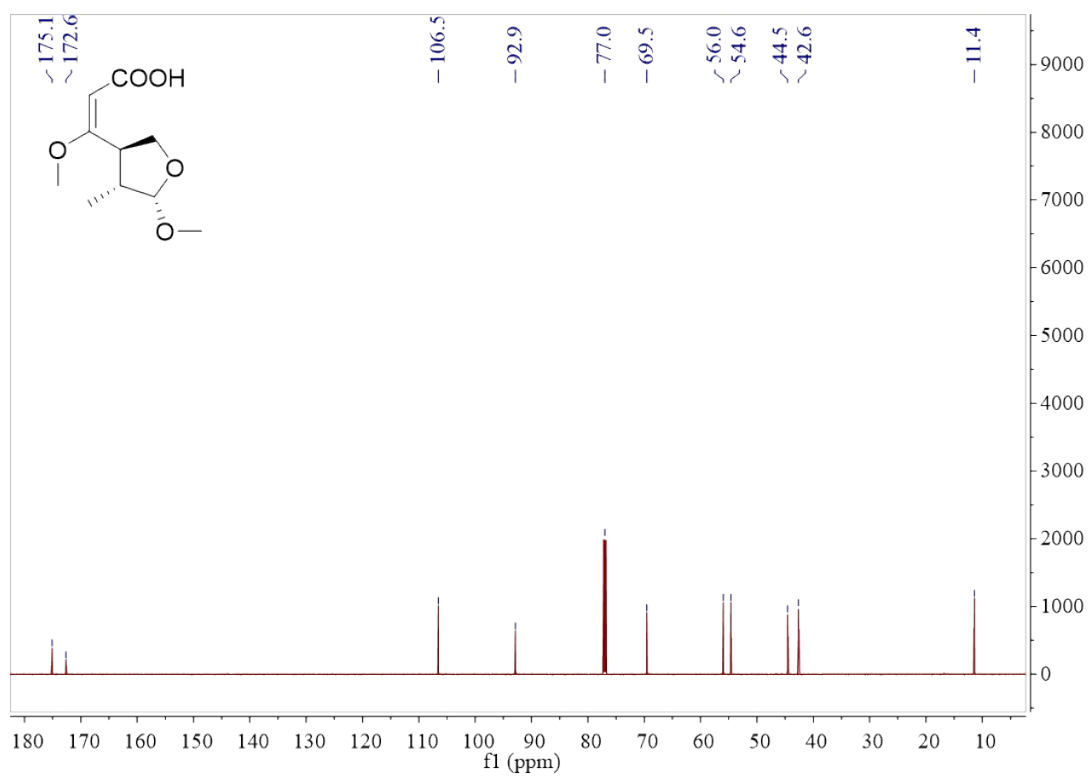

Figure S53.  $^{13}\text{C}$  NMR spectrum of 11 in  $\text{CDCl}_3$  at 150 MHz.

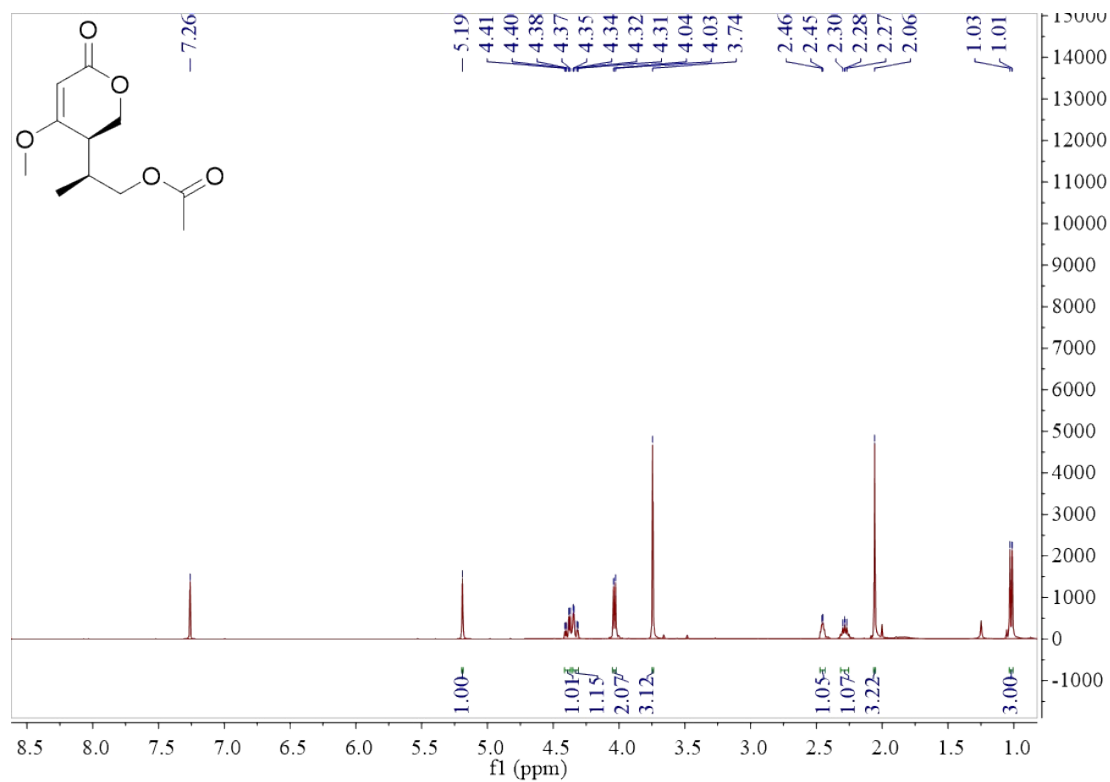

Figure S54.  $^1\text{H}$  NMR spectrum of Ac-5 in  $\text{CDCl}_3$  at 400 MHz.

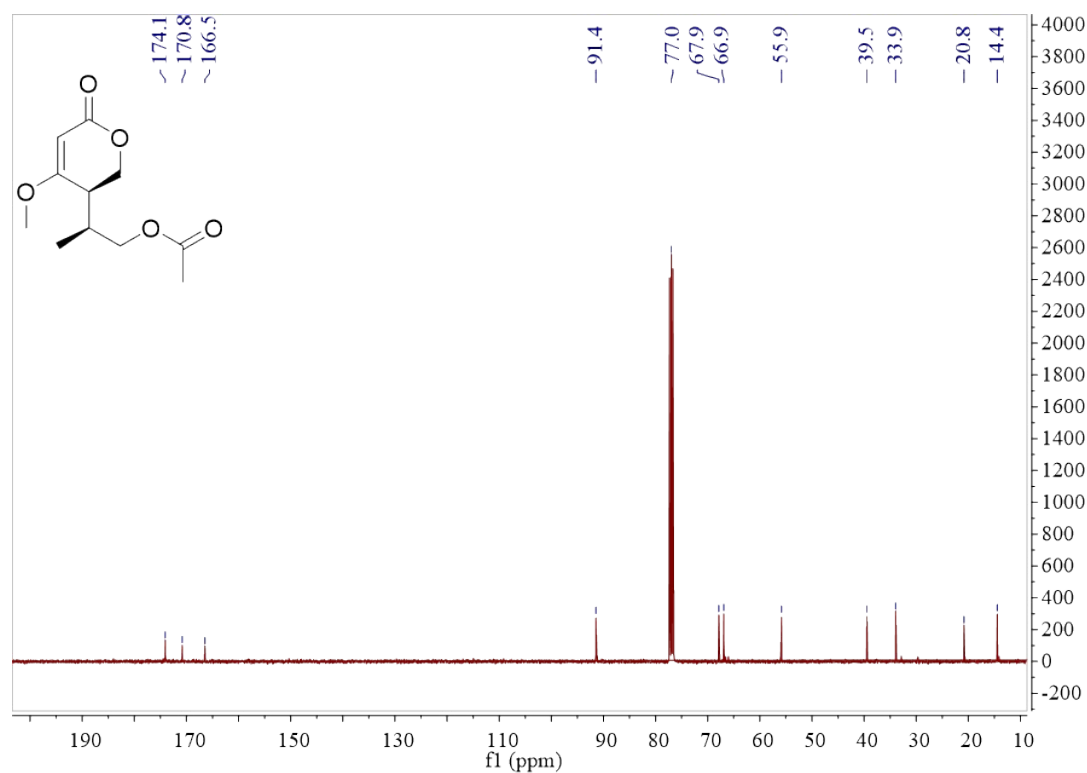

Figure S55.  $^{13}\text{C}$  NMR spectrum of Ac-5 in  $\text{CDCl}_3$  at 100 MHz.
